# Supplementary material for: Inflammation induced by tumor-associated nerves promotes resistance to anti-PD-1 therapy in cancer patients and is targetable by IL-6 blockade
Source: Research Square preprint supplement (doi:10.21203/rs.3.rs-3161761/v1), 2023-07-18
Supplement: Supplementary file 1 [file 2e980a276353241dce18ea0b.xlsx]

## Sheet: Sheet1
GO terms associated with immune activity enriched by DEG between DRG neurons + cancer cells (IC8) vs DRG neurons alone (out of top 200 all enriched GO pathways)
#Term	Database	ID	Input number	Background number	P-Value	FDR P-Value	Input	Hyperlink
innate immune response	Gene Ontology	GO:0045087	94	558	5.9448e-19	1.3031e-16	TRIM11|TRIM14|IL1RL2|STYK1|MFHAS1|IL23A|POLR3G|PTK2B|POLR3E|POLR3K|C1RL|GSDMD|RELB|LYN|IRAK1|TRIM29|RNASE7|TRIM25|TRIM26|TRIM27|RAE1|GATA3|CRCP|SYK|PARP14|MST1R|PQBP1|TLR2|TLR3|POP1|LYAR|LGR4|MX1|UNC93B1|DDX58|TIRAP|PARP9|VNN1|HERC5|ECSIT|DDX60|WFDC3|WFDC2|TNK1|IRF7|NLRP3|ARG2|MB21D1|DTX3L|MCOLN2|PRKDC|REL|TICAM1|SKP2|C1orf106|DHX58|NLRP2|LCN2|S100A9|RBM14|SRC|OTULIN|DAB2IP|DDX21|AIM2|IGF2BP1|SRP…	http://amigo.geneontology.org/amigo/term/GO:0045087
positive regulation of NF-kappaB transcription factor activity	Gene Ontology	GO:0051092	44	159	6.55001e-16	1.05571e-13	TRIM14|IL1RAP|HSPA1B|HSPA1A|RIPK2|RPS3|RIPK4|TLR2|IL1B|DHX33|TICAM1|NLRP3|TIRAP|IL18R1|PYCARD|TFRC|S100A9|ICAM1|IRAK2|PSMA6|NFKB2|IRAK1|PRKCI|PRKCH|SLCO3A1|TRIM25|CARD11|TRIM27|CARD16|AIM2|PRKCZ|NFKB1|TRIML2|BCL10|IL18|RPS6KA4|RPS6KA5|EIF2AK2|ADAM8|IL6|TLR3|FLOT2|DDRGK1|PRKD2	http://amigo.geneontology.org/amigo/term/GO:0051092
inflammatory response	Gene Ontology	GO:0006954	68	381	3.72942e-15	5.67701e-13	TICAM1|PTGS1|ITCH|CCL5|LTB4R2|CCL8|EPHA2|MFHAS1|NFKBIZ|RIPK2|PTAFR|NLRP10|REL|IL1A|ZC3H12A|IL1B|ADAM8|CYBA|CASP4|CEBPB|IL1RL2|NLRP3|TIRAP|SPR|GSDMD|PYCARD|GAL|S100A9|C3|NFKB1|CXCL1|RELB|ITGB6|PARP4|VNN1|DAB2IP|IL18R1|TIFA|SMAD1|IRAK2|TNIP1|IL1RAP|CXCL11|AIM2|NFRKB|IL17RE|F11R|IL18|TLR2|CXCL3|CXCL2|RPS6KA4|RPS6KA5|OLR1|CXCL6|CXCL8|NLRP2|TNFAIP3|IL6|ACER3|PRKCZ|IL23A|SDC1|CCL3|CCL20|F2RL1|SIGLEC1|N…	http://amigo.geneontology.org/amigo/term/GO:0006954
type I interferon signaling pathway	Gene Ontology	GO:0060337	24	66	2.43428e-11	2.08435e-09	MX2|MX1|IFIT3|RSAD2|IFIT1|EGR1|IFIT2|OAS1|OAS3|OAS2|ISG15|IRAK1|IFITM3|IFITM1|IFI35|IRF1|OASL|IRF3|XAF1|IRF7|IRF6|IRF5|IFI6|PSMB8	http://amigo.geneontology.org/amigo/term/GO:0060337
positive regulation of I-kappaB kinase/NF-kappaB signaling	Gene Ontology	GO:0043123	39	185	3.89466e-11	3.23375e-09	TGM2|TNFSF10|TRIM14|C1orf106|PLK2|BIRC3|CASP10|RIPK2|REL|IKBKE|IL1B|GPRC5B|LTBR|TICAM1|TMED4|ZDHHC13|ECT2|TIRAP|NDFIP2|TFRC|TRIML2|TRAF3IP2|IRAK1|AJUBA|PIM2|TRIM25|CARD11|TRIM27|CARD16|TNFRSF25|BCL10|IRF3|DDX21|CASP1|LITAF|CASP8|TLR3|MAP3K14|F2RL1	http://amigo.geneontology.org/amigo/term/GO:0043123
positive regulation of type I interferon production	Gene Ontology	GO:0032481	21	52	8.89007e-11	6.86163e-09	IRF3|TICAM1|IRF1|MRE11A|DHX33|IRF7|DHX58|POLR3G|SYK|PRKDC|PQBP1|POLR2H|ZCCHC3|CRCP|POLR3E|MB21D1|IGF2BP1|NFKB1|NFKB2|IRAK1|POLR3K	http://amigo.geneontology.org/amigo/term/GO:0032481
positive regulation of interleukin-6 production	Gene Ontology	GO:0032755	24	90	4.52175e-09	2.60834e-07	IFIH1|C1orf106|RIPK2|NLRP10|IL1A|IL1B|TICAM1|ADORA2B|IL1RL2|DHX58|TIRAP|HSPD1|PYCARD|DDX58|IL6R|CYBA|LCP1|SYK|TLR2|IL6|TLR3|EREG|F2RL1|POU2F2	http://amigo.geneontology.org/amigo/term/GO:0032755
positive regulation of interleukin-1 beta production	Gene Ontology	GO:0032731	19	57	9.16142e-09	5.02046e-07	CCL3|NLRP7|EGR1|FZD5|C1orf106|CASP1|TRIM16|GSDMD|CASP8|SMAD3|IL6|NLRP2|POP1|RIPK2|NLRP3|PYCARD|PANX1|LCP1|AIM2	http://amigo.geneontology.org/amigo/term/GO:0032731
tumor necrosis factor-mediated signaling pathway	Gene Ontology	GO:0033209	27	121	1.33849e-08	6.85508e-07	TNFRSF11B|TNFSF15|DTL|PSMF1|NFKBIA|BIRC3|PTK2B|KRT8|LTBR|PSMA2|PSMA6|PSMA7|PYCARD|TNFRSF9|EDARADD|TRAF3|TRAF4|AIM2|LTB|TNFRSF25|PSMD11|POP1|MAP3K14|PSMB9|PSMB8|PSMB7|KRT18	http://amigo.geneontology.org/amigo/term/GO:0033209
positive regulation of inflammatory response	Gene Ontology	GO:0050729	21	81	6.16311e-08	2.88665e-06	IL18|CEBPB|TNIP1|ZP3|IL23A|TLR3|ITGA2|NFKBIA|EGFR|TGM2|NFKBIZ|HSPD1|ETS1|S100A9|NLRP10|IGF2BP1|TLR2|IL1B|LCP1|CCL3|GPRC5B	http://amigo.geneontology.org/amigo/term/GO:0050729
neutrophil degranulation	Gene Ontology	GO:0043312	59	482	1.00272e-07	4.504e-06	LCN2|PSMD11|CAB39|HSPA1B|HSPA1A|STXBP2|PTAFR|ATP11B|PKP1|DNAJC5|HSP90AB1|PGM2|SERPINA1|CDK13|CPNE1|HMHA1|GSDMD|NAPRT|PSMA2|JUP|S100A9|CAPN1|B4GALT1|NFKB1|CST6|RAP2B|CXCL1|ANXA3|CTSC|DIAPH1|VNN1|DSP|C3|ERP44|RAB3D|PLAU|PYCARD|SERPINB1|LRG1|RHOF|SLC27A2|HPSE|ABCA13|CDA|OLR1|PTGES2|C1orf35|UNC13D|ADAM8|HMOX2|TLR2|SLPI|GSTP1|CYBA|EBP|AGPAT2|VAMP8|PSMB7|HSP90AA1	http://amigo.geneontology.org/amigo/term/GO:0043312
negative regulation of type I interferon production	Gene Ontology	GO:0032480	13	31	2.41092e-07	1.0009e-05	IRF3|IFIH1|DHX58|ITCH|C6orf106|IKBKE|DDX58|TNFAIP3|UBE2L6|ISG15|TRIM25|HERC5|NMI	http://amigo.geneontology.org/amigo/term/GO:0032480
positive regulation of interferon-beta production	Gene Ontology	GO:0032728	12	32	1.8085e-06	6.04305e-05	IRF3|TICAM1|IRF1|IRF7|IRF5|DHX58|POLR3G|IFIH1|TLR2|TLR3|RIPK2|DDX58	http://amigo.geneontology.org/amigo/term/GO:0032728
interleukin-1-mediated signaling pathway	Gene Ontology	GO:0070498	20	94	1.85113e-06	6.08175e-05	PSMB8|EGR1|RPS6KA4|RPS6KA5|IL1RL2|PSMF1|NFKBIA|PSMD11|PSMA2|IRAK2|RIPK2|PSMA6|PSMA7|PSMB9|IL1RAP|PSMB7|NFKB1|IL1B|IRAK1|IL1A	http://amigo.geneontology.org/amigo/term/GO:0070498
positive regulation of interleukin-8 production	Gene Ontology	GO:0032757	15	54	2.24677e-06	7.11695e-05	TLR2|DDX58|F3|TIRAP|SYK|BCL10|IL6|HSPA1B|HSPA1A|NLRP10|TLR3|PYCARD|F2RL1|IL1B|PRKD2	http://amigo.geneontology.org/amigo/term/GO:0032757
cellular response to interleukin-1	Gene Ontology	GO:0071347	18	80	3.03316e-06	9.18326e-05	CCL20|CEBPB|TRAF2|CCL5|CXCL8|CCL8|LCN2|DAB2IP|NLRP7|PYCARD|SOX9|UPF1|MAPK11|ICAM1|NFKB1|CCL3|ZC3H12A|OTUB1	http://amigo.geneontology.org/amigo/term/GO:0071347
