# Supplementary material for: Inflammation induced by tumor-associated nerves promotes resistance to anti-PD-1 therapy in cancer patients and is targetable by IL-6 blockade
Source: Research Square preprint supplement (doi:10.21203/rs.3.rs-3161761/v1), 2023-07-18
Supplement: Supplementary file 2 [file 365089d6efb42b55269566c3.docx]

**Methods**

*Analysis of TCGA data set of HNSCC patients*

We considered the TCGA data set of HNSCC patients with available clinical information, and RNASeq data. The data set comprised 514 patients including 216 (42%) events of death with a median survival time of 1050 days. TCGA RNASeq data was obtained from National Cancer Institute Genomic Data Commons (<https://portal.gdc.cancer.gov/>) (Broad Institute TCGA Genome Data Analysis Center) [1](#_ENREF_1). We used a curated version of the clinical and follow up information published by Liu et al. [2](#_ENREF_2) and obtained from the Genomic Data Commons website (<https://gdc.cancer.gov/node/905/>).

To investigate the presence of a neuronal injury phenotype in the TCGA HNSCC cohort, we evaluated in each tumor sample the enrichment of gene expression signatures linked to neuronal injury by performing Single-sample Gene Set Enrichment Analysis (ssGSEA) using in the GenePattern online tool [3](#_ENREF_3). ssGSEA calculates an enrichment score (ES) for each sample based on a defined set of genes. The ES reflects the degree to which the gene set constituents are simultaneously up- or down-regulated in a sample [4](#_ENREF_4),[5](#_ENREF_5). The selected gene sets associated with neuronal dysfunction (HP_ Abnormal cranial nerve physiology, HP_ Abnormal Peripheral Nervous System Morphology, HP_ Decreased Size Of Nerve Terminals, HP_ Alzheimer Disease, HP_ Abnormality Of Neuronal Migration, HP_ Abnormality Of The Autonomic Nervous System, HP_ Weakness Due To Upper Motor Neuron Dysfunction, and HP_ Axonal Degeneration) were retrieved from the Human Phenotype Ontology (HPO) database, which congregates an assembly of gene expression signatures for human phonotypic abnormalities (<https://hpo.jax.org/>) [6](#_ENREF_6). Determination of nerve-injury phenotype for each sample was achieved by hierarchical clustering analysis (HCA) using the Ward minimum variance method for defining distances between clusters. Cluster distances were computed on standardized ssGSEA enrichment score values. Samples with consistent high enrichment score values for most of the selected gene sets were categorized as “nerve injury-enriched” and the remaining samples as “non-enriched” (Extended Data – Supplementary Table 1).

To identify immunophenotype groups within the HNSCC TCGA samples we considered a tumor immune infiltration gene expression signature (Extended Data – Supplementary Table 1) that was also predictive of response and progression-free survival to anti-PD-1 therapy in squamous tumors [7](#_ENREF_7). The expression pattern of the signature genes among HNSCC TCGA samples was assessed by hierarchical clustering analysis (HCA) using the Ward minimum variance method for defining distances between clusters. Cluster distances were computed on standardized gene expression values. HNSCC TCGA samples displaying high expression of the signature genes were categorized as “High immune”, while the remaining samples were categorized as “Low immune”. Associations between categorical variables and survival were determined by the log-rank test, considering a 5-year follow-up interval.

*Clinical Trial*

The study protocol was approved by the appropriate institutional review board or independent ethics committee at each participating study site. The study protocol and statistical analysis plan are available online (NCT04154943). The study was conducted in accordance with the principles of the Declaration of Helsinki and the International Conference on Harmonization Good Clinical Practice guidelines. All patients provided written informed consent. The authors had unrestricted access to the data and were responsible for all content. Patients older than 18 years old were eligible if they had resectable stage II–IV (M0) CSCC for which primary surgery would be recommended in routine clinical practice. Patients with stage II CSCC were required to have a primary tumor ≥3 cm in longest diameter. Patients were additionally required to have adequate organ function (determined by assessment of complete blood cell count and comprehensive metabolic function), at least one measurable lesion per Response Evaluation Criteria in Solid Tumors version 1.1 (RECIST 1.1) [8](#_ENREF_8) and Eastern Cooperative Oncology Group (ECOG) performance status of 0 or 1 (a 5-point system where higher numbers reflect greater disability). Patients who had received prior radiation therapy for CSCC were ineligible. This non-randomized, multicenter, single-arm, phase 2 study enrolled patients in Australia, Germany, and the United States evaluating cemiplimab as neoadjuvant therapy in eligible patients with resectable CSCC before curative-intent surgery. This manuscript reports patients enrolled in the University of Texas MD Anderson cancer center (Houston, Texas, USA) and Moffitt cancer center (Tampa, Florida, USA).

After a screening period of up to 28 days, patients received neoadjuvant cemiplimab 350 mg intravenously every 3 weeks until unacceptable toxicity, disease progression, or withdrawal of consent. Imaging assessments were performed at baseline and at weeks 6 and 12. After completion of neoadjuvant treatment, the protocol window for surgery was study days 75–100. If the patient met criteria for early discontinuation of cemiplimab during the neoadjuvant period, the treating physician could divert the patient to surgery at an earlier time.

Pretreatment biopsy specimens were subjected to histopathologic assessment for confirmation of diagnosis and to permit morphologic comparison between tumor tissue before treatment and any residual tumor following therapy. Pathologic response was assessed in the posttreatment surgical specimens according to standard pathologic evaluation recommendations[9](#_ENREF_9) and re-reviewed by a dedicated dermatopathologist (PN) to standardize reporting. The primary endpoint was pCR, defined as the absence of viable tumor in post-treatment surgical specimens, determined per independent central pathology review. Major pathologic response (MPR) was a secondary endpoint and was defined by the presence of >0% but ≤10% viable tumor cells in post-treatment surgical specimens. The definitions specified for MPR and pCR were according to the immune-related pathologic response criteria [10](#_ENREF_10).

*High-plex, high-dimensional immunofluorescence staining and analysis*

The Lunaphore Comet (Switzerland) was employed to perform staining and imaging on the FFPE tissue samples. In brief, FFPE slides were placed in tanks containing BioGenex EZ Elegans AR 2 buffer, which was in turn enclosed inside a BioGenex EZ Retriever microwave system. The samples were heated in the microwave to 107oC for 15 minutes to dewax, rehydrate, and retrieve the antigens. After heating, the slides were cooled to room temperature and then loaded into the Comet and covered and sealed by a Fast-Fluidic Exchange microfluidics chip for staining and imaging in the instrument. The Comet performs a sequential immunofluorescence-based staining and imaging followed by an elution of the primary and secondary antibodies. Antibodies were titrated for optimal signal and verified to elute from the tissue using a “Characterization Type 2” instrument protocol where slides are stained, imaged, eluted, re-imaged for elution verification, and then subsequently re-stained etc. During the titration steps, these elution images were collected to demonstrate the system performed as prescribed and titrations were empirically determined. During data collection, staining and imaging elution images were not collected, thus the imager would stain, image, and elute the samples, repeating these cycles 10 times (2 primary antibodies and 2 secondary antibodies per cycle) to collect the information on the 20 antibodies (Neuro-immune panel) and 12 antibodies (Myelin degradation panel) targets used in this study (**see Tables below**). The Comet collected images in OME-Tiff formats, which were scanned and then visualized in Comet Viewer (Lunaphore, Switzerland).

Following visuualization, image quantification was completed using Oncotopix Discovery (Visiopharm, version 2023.01) [11](#_ENREF_11),[12](#_ENREF_12)*.* A deep learning classifier was trained using specific tissue features from annotated reference images to guide in the identification of regions of interest (ROIs). In briefly, tissue ROI was created following the training of two variables (tissue and non-tissue regions). Tissue and ROI boundaries were then delineated using image analysis smoothing. Aberrant signals, such as those caused by dust particles, tissue folds, or air bubbles, were excluded manually from the ROIs. For nerve identification, another deep learner classifier was developed and trained following two training variables (Nerve and non-nerve structure) within the delineated tissue ROI regions. For delineating the nerve within the tissue ROI nerve markers NFH/B3T were used. The following training parameters were used to developed the nerve identification app, as follows, Input: NFH and B3T; Learning parameters: learning rate-1.0e-05; Mini-batch size-2; Loss function: cross-entropy; Iteration: 30,0000. All area other than NFH+/B3T+ were identified via watershed de-segmentation of the nuclear DAPI signal and ensuring the removal of incomplete nuclei by size exclusion. The resulting nuclear mask was enlarged by another 1.25 microns (5 pixels) to capture both nuclear and adjacent cytoplasmic fluorescent signals. A further estimation of the cytoplasm was generated using a dilation of the nuclear mask to maximum of 3.75 microns (15 pixels). Cell types were identified using a hierarchical decision tree with empirically determined thresholds that were visually verified across the tissues. NFH+/B3T+ nerves were segmented using NFH/B3T signal intensity. Nerve nuclei were excluded a priori from the initial cell classification strategy, and only those that exceeded the threshold for NFH+/B3T+ levels were incorporated into the nerve mask. Neural niches were determined to be a 150-μm (NFH+/B3T+) ROI diameter around each nerve (NFH+/B3T+). All object-based phenotyping result tables were exported as csv files to be analyzed in the R environment. The detailed approach for classification of nerves are shown in **Tables below**.

| **Neuroimmune panel:** Antibody targets used in the staining procedure along with their order placement in the staining, imaging, elution process. | | | | | | |
| --- | --- | --- | --- | --- | --- | --- |
| **Order** | **Target** | **Clone** | **Host** | **Dilution** | **Channel** | **Vendor** |
| 1 | GAP43 | 8945 | Rabbit | 1: 50 | 555 | CST |
| 2 | NFH | ab4680 | Chicken | 1: 250 | 647 | Abcam |
| 3 | FOXP3 | 22173-1 | Rabbit | 1:100 | 555 | Proteintech |
| 4 | CD68 | A500-018A-A | Mouse | 1:100 | 647 | Fortis-Life-Science |
| 5 | CD11c | 93233 | Rabbit | 1:100 | 555 | CST |
| 6 | Perforin | AB47225 | Mouse | 1:100 | 647 | Abcam |
| 7 | Granzyme B | 13588-1-AP | Rabbit | 1:100 | 555 | Abcam |
| 8 | CD163 | MA5-11458 | Mouse | 1:100 | 647 | Thermo-Fisher Scientific |
| 9 | CD86 | A700-030 | Rabbit | 1:100 | 555 | Bethyl |
| 10 | CD8a | A500-021A | Mouse | 1:100 | 647 | Thermo-Fisher Scientific |
| 11 | CD4 | AB181724 | Rabbit | 1:100 | 555 | Abcam |
| 12 | PD1 | 181-06-1-AP | Mouse | 1:50 | 647 | Proteintech |
| 13 | S100 | AB215989 | Rabbit | 1:100 | 555 | Abcam |
| 14 | DCX | MA5-17066 | Mouse | 1: 100 | 647 | Thermo-Fisher Scientific |
| 15 | c-Jun | 9165s | Rabbit | 1:50 | 555 | CST |
| 16 | LAG3 | TA807082 | Mouse | 1:100 | 647 | Thermo-Fisher Scientific |
| 17 | ATF3 | PA5-106898 | Rabbit | 1:50 | 555 | Thermo-Fisher Scientific |
| 18 | PDL1 | 66248-1-1-G | Mouse | 1:50 | 647 | Proteintech |
| 19 | B3Tubulin | ab18207 | Rabbit | 1: 250 | 555 | Abcam |
| 20 | GFAP | 3670 | Mouse | 1:50 | 647 | CST |
| Staining was performed for 4-8 minutes per cycle for primary anitbodies which were diluted 1:50-1:250 in Multistaining Buffer (Lunaphore, Switzerland). Seconary antibodies, Alexafluor 555 and Alexafluor 647 (ThermoFisher) were diluted 1:200 and 1:400 respectively in Multistaining Buffer. Tissues were counterstained with DAPI solution (ThermoFisher) at every cycle. Imaging was performed on the Comet at 80 msec for DAPI, 400 msec for Alexafluor 555, and 200 msec for Alexafluor 647 at each cycle. Elution was peformed for 4 min using Elution Buffer (Lunaphore, Switzerland). | | | | | | |

| **Myelin Degradation panel:** Antibody targets used in the staining procedure along with their order placement in the staining, imaging, elution process. | | | | | | |
| --- | --- | --- | --- | --- | --- | --- |
| **Order** | **Target** | **Clone** | **Host** | **Dilution** | **Channel** | **Vendor** |
| 1 | B3Tubulin | ab18207 | Rabbit | 1: 250 | 555 | Abcam |
| 2 | NFH | ab4680 | Chicken | 1: 250 | 647 | Abcam |
| 3 | dMBP | AB5864 | Rabbit | 1:100 | 555 | Millipore Sigma |
| 4 | CD68 | A500-018A-A | Mouse | 1:100 | 647 | Fortis-Life-Science |
| 5 | c-Jun | 9165s | Rabbit | 1:50 | 555 | CST |
| 6 | CD163 | MA5-11458 | Mouse | 1:50 | 647 | Thermo-Fisher Scientific |
| 7 | GALC | MAB342 | Mouse | 1:50 | 555 | Millipore Sigma |
| 8 | Blank | - | - | - | 647 | - |
| 9 | MBP | 78896 | Rabbit | 1:100 | 555 | CST |
| 10 | ATF3 | PA5-106898 | Rabbit | 1:50 | 647 | Thermo-Fisher Scientific |
| 11 | Blank | - | - | - | 555 | - |
| 12 | S100 | AB215989 | Rabbit | 1:250 | 647 | Abcam |
| 13 | GFAP | 3670 | Mouse | 1:100 | 555 | CST |
| 14 | Blank | - | - | - | 647 | - |
| 15 | Cytokeratin | 26411-1-AP | Rabbit | 1:2000 | 555 | Proteintech |
| 16 | Blank | - | - | - | 647 | - |

*Immunohistochemistry (Clinical trial samples)*

Immunohistochemical analysis was performed using 4-μm FFPE tissue samples obtained before and after anti-PD-1 therapy. Staining of sections of these samples was performed using antibodies against CD8 (Thermo Fisher Scientific; cat. #MS-457s), PD-1 (Abcam; cat. #ab137132), and PD-L1 (Cell Signaling Technology; cat. #13684S) using a BOND-RX instrument with a Bond Polymer Refine Detection Kit (Leica Biosystems; cat. #DS9800). Slides containing these sections were scanned and digitalized using a ScanScope XT system (Aperio/Leica Biosystems). Single stain annotations for the TME were performed by a pathologist, and immunohistochemical quantification of the above-mentioned markers was done using HALO software (version 2.3.2089.70; Indica Labs). The number of marker-positive cells in the TME was calculated and expressed as positive cells density (number of positive cells/mm2). Statistical analysis was done using a two-tailed Mann-Whitney *U* test using Prism (version 9). *P* values less than 0.05 were considered significant.

*GeoMx digital spatial profiling (DSP) experimental design (Clinical Trial samples)*

FFPE HNSCC samples were used for digital spatial profiling of the neural and immune markers protein expression (see below the description of assays and markers used). First we mapped the neural niches using hematoxylin- and eosin-stained tissue section including tumor as well as surrounding uninvolved tissue. These slides were scanned using a ScanScope digital pathology system (Aperio) in SVS format at a magnification of 40× and visualized using ImageScope viewing software (Aperio). All nerve profiles in the specimen were annotated, including perineural invasion. The extent of viable tumor or tumor bed and uninvolved tissue was drawn or designated on whole slide scans. The respective tumor and surrounding uninvolved tissue were obtained using the annotations in Aperio files. The nerve density was calculated as the ratio between total number of nerves and the tumor or normal area (mm2), and the nerve invasion index was calculated as the number of invaded nerves divided by the tumor area (mm2).

Next, two serially sectioned 5-μm-thick consecutive tissue sections obtained before and after anti-PD-1 therapy were stained according to the semiautomated GeoMx DSP standard protein protocol[13](#_ENREF_13) using the BOND-RX system to profile tumor-associated nerves and their perineural microenvironments (neural niches). Both sections were stained for the following morphology biomarkers: panCK, SYTO 13 (GeoMx Solid Tumor TME Morphology Kit, NanoString; cat. #121300301), beta-III-tubulin (clone EP1569Y, AF, Abcam; cat. #ab52623; 1:2000 μg/ml), and neurofilament (clone EPR20020, AF, Abcam; cat. #ab207176; 1:1000 μg/ml), Extended Data Figure 3. Optimization of immunofluorescence biomarkers was previously performed with different antibody dilutions using normal colon tissue to achieve the highest signal-to-noise ratio. One tumor section was used to profile tumor-associated nerves with the DSP neural cell profiling core (cat. #GMX-PROCO-NCT-HNCP-12) and GeoMx Parkinson's pathology panel (cat. #GMX-PROMOD-NCT-HPDP-12). A serial tissue section was used to profile the perineural microenvironment with the following DSP human immuno-oncology protein core panel and modules: GeoMx Immune Cell Profiling (cat. #121300101), GeoMx IO Drug Target Assay (cat. #121300102), GeoMx Immune Activation Status Assay (cat. #121300103), and GeoMx Immune Cell Typing Assay (cat. #121300104; 49 protein targets). After scanning using the GeoMx DSP device, multiplex immunofluorescent imaging slides were visualized with adjustment of channel thresholds for each fluorophore. Regions of interest (ROIs)were selected after pathological evaluation of sequential sections of hematoxylin- and eosin-stained nerve fibers in tumor tissue and tumor bed tissue identified by an expert pathologist (P.N.). A polygon and rectangle selection tool was applied to selection of ROIs of up to 660 x 785 μm using a two-step strategy. 1) Nerve profiling: A slide labeled with a DSP neuroprotein panel was used to select up to 12 intratumoral ROIs containing tumor-associated nerve fibers. Neural niches were identified and segmented using the beta-III-tubulin (+), Neurofilament Heavy (NF-H) (+) and panCK (-) phenotype. 2) Perineural niche immune profiling: A consecutive section labeled with a DSP human immuno-oncology protein panel was used to select up to 12 *matching* ROIs with tumor-associated nerves. The matching perineural microenvironment compartment, i.e., neural niches, were identified using the same morphology markers (i.e. beta-III-tubulin (+), Neurofilament Heavy (NF-H) (+) and panCK (-) phenotype**)**.

Segmented areas (also known as areas of illumination) were illuminated individually using ultraviolet light with the GeoMx DSP device. Oligonucleotide tags conjugated with antibodies present within each area of illumination were photocleaved. Released tags were quantitated using an nCounter, and tag counts of the various markers were mapped back to each corresponding tissue location, yielding a spatially resolved digital profile of analyte abundance. Digital counts were normalized using background correction. DSP data analysis software was used to visualize protein expression patterns and statistical analysis [14](#_ENREF_14),[15](#_ENREF_15). Differences in protein expression between groups were assessed by Wilcoxon 2-tailed test followed by FDR correction. Correlation among proteins measured by DSP was determined by Pearson Correlation Test.

*Scanning electron Microscopy*

Fixed samples containing 3% glutaraldehyde plus 2% paraformaldehyde in 0.1 M cacodylate buffer, pH 7.3, were washed with 0.1 M cacodylate buffer, pH 7.3, post fixed with 1% cacodylate buffered osmium tetroxide, washed with 0.1M cacodylate buffer, then in distilled water. Afterwards, the samples were sequentially treated with Millipore-filtered 1% aqueous tannic acid, washed in distilled water, treated with Millipore-filtered 1% aqueous uranyl acetate, then rinsed thoroughly with distilled water. The samples were dehydrated with a graded series of increasing concentrations of ethanol, then transferred to graded series of increasing concentrations of hexamethyldisilazane (HMDS) and air dried overnight. Samples were mounted on to double-stick carbon tabs (Ted Pella. Inc., Redding, CA), which have been previously mounted onto glass microscope slides. The samples were then coated under vacuum using a Balzer MED 010 evaporator (Technotrade International, Manchester, NH) with platinum alloy for a thickness of 25 nm., then immediately flash carbon coated under vacuum. The samples were transferred to a desiccator for examination at a later date. Samples were examined/imaged in a JSM-5900 scanning electron microscope (JEOL, USA, Inc., Peabody, MA) at an accelerating voltage of 5 kV.

*Transmission electron microscopy*

Samples were fixed with a solution containing 3% glutaraldehyde plus 2% paraformaldehyde in 0.1 M cacodylate buffer, pH 7.3, then washed in 0.1 M sodium cacodylate buffer and treated with 0.1% Millipore-filtered cacodylate buffered tannic acid, postfixed with 1% buffered osmium tetroxide,

and stained en bloc with 1% Millipore-filtered uranyl acetate. The samples were dehydrated in increasing concentrations of ethanol, infiltrated, and embedded in LX-112 medium. The samples were polymerized in a 60 C oven for approximately 3 days. Ultrathin sections were cut in a Leica Ultracut microtome (Leica, Deerfield, IL), stained with uranyl acetate and lead citrate and examined in a JEM 1010 transmission electron microscope (JEOL, USA, Inc., Peabody, MA) at an accelerating voltage of 80 kV.  Digital images were obtained using AMT Imaging System (Advanced Microscopy Techniques Corp, Danvers, MA).

*Transcriptome sequencing*

*Nucleic acid extraction, library preparation and sequencing*

The DNA/RNA extraction was performed with Mag-Bind® FFPE DNA/RNA 96 Kit (Omega Bio-Tek) following manufacture’s protocol. Isolated RNA sample quality was assessed by High Sensitivity RNA Tapestation (Agilent Technologies Inc., California, USA) and quantified by Qubit 2.0 RNA HS assay (ThermoFisher, Massachusetts, USA). Libraries were constructed with KAPA™ RNA HyperPrep with RiboErase (Roche, Indiana, USA) and performed based on manufacturer’s recommendations. Final library quantity was measured by KAPA SYBR® FAST qPCR and library quality evaluated by TapeStation D1000 ScreenTape (Agilent Technologies, CA, USA). Final library size was about 430bp with an insert size of about 200bp. Illumina® 8-nt dual-indices were used. Equimolar pooling of libraries was performed based on QC values and sequenced on an Illumina® NovaSeq (Illumina, California, USA) with a read length configuration of 150 PE for 80 M PE reads per sample (40 M in each direction).

Extracted genomic DNA was then quantified with Qubit 2.0 DNA HS Assay (ThermoFisher, Massachusetts, USA) and quality assessed by Tapestation genomic DNA Assay (Agilent Technologies, California, USA). Library preparation was performed using SureSelectXT Low Input Reagent Kits (Agilent Technologies Inc., California, USA) per manufacturer’s recommendations. Exome capture was performed with IDT xGen Exome Research Panel v2.0. Library quality and quantity were assessed with Qubit 2.0 DNA HS Assay (ThermoFisher, Massachusetts, USA), Tapestation High Sensitivity D1000 Assay (Agilent Technologies, CA, USA), and QuantStudio ® 5 System (Applied Biosystems, USA). Illumina® 8-nt dual-indices were used. Equimolar pooling of libraries was performed based on QC values and sequenced on an Illumina® NovaSeq (Illumina, California, USA) with a read length configuration of 150 PE for 130 M PE reads (65 M in each direction) or 26 M PE reads (13 M in each direction)

RNA-seq data processing and analysis. Raw paired-end reads in FASTQ format were checked for read quality using FastQC (version 0.11.8; http://www.bioinformatics.babraham.ac.uk/projects/fastqc/). Illumina TruSeq adapters were trimmed from the paired-end reads using cutadapt (version 1.18). The trimmed reads were then aligned to the GENCODE human reference genome GRCh38 using STAR software (version 2.7.0f). FeatureCounts (subread 1.6.3) was applied to counting reads mapped to each gene. Genes were annotated using the gene transfer format file for GRCh38. Read counts were normalized using the trimmed mean of M method implemented in the R Bioconductor package edgeR to determine the abundance of each gene. The generalized linear model likelihood ratio test from edgeR was used to identify significant differentially expressed genes between groups. The Benjamini-Hochberg correction method was applied to the *P* values for multiple testing adjustment.

*Pathway enrichment analyses*

Pathway enrichment analysis was performed using the web server KOBAS 3.0 (http://kobas.cbi.pku.edu.cn) parsing several pathway databases, including Reactome and KEGG Pathway, and the functional category database Gene Ontology [16](#_ENREF_16). Enrichment significance was assessed by hypergeometric test/Fisher exact test and FDR correction using the Benjamini and Hochberg method. Prediction of pathway activation/inhibition was performed using the QIAGEN Ingenuity Pathway Analysis (IPA) software, which uses a manually curated pathway database. Pathways were considered significantly enriched when the z-score was < 1 or > 1 and p < 0.05. Positive z-scores are indicative of activation, while negative z-scores are suggestive of inhibition of a given pathway. The significantly enriched pathways from the Reactome database were represented as Voronoi Diagrams built using the online tool Bionic Visualizations (http://bionic-vis.biologie.uni-greifswald.de) [17-19](#_ENREF_17).

*NanoString gene expression analysis*

RNA was isolated from formalin-fixed, paraffin-embedded (FFPE) tumor sections via dewaxing using a deparaffinization solution (QIAGEN), and total RNA was extracted using a RecoverAll Total Nucleic Acid Isolation Kit (Ambion) according to the manufacturer’s instructions. The RNA purity and quantity were assessed using a NanoDrop ND-1000 spectrometer (Thermo Fisher Scientific).For a NanoString assay, 100 ng of RNA was used to detect immune gene expression using an nCounter PanCancer Immune Profiling Panel along with a custom CodeSet (NanoString). Counts of the reporter probes were tabulated for each sample using an nCounter Digital Analyzer, and raw data output was imported into the nSolver software program (version 4.0; NanoString). Also, the nSolver (Advanced Analysis 2.0) data analysis package was used for normalization of expression levels, cell type, and differential gene expression analyses. Gene set enrichment analysis was performed with Qlucore Omics Explorer software (version 3.7). Data were plotted using Prism software (version 9; GraphPad Software), and two-tailed Mann-Whitney *U* tests were performed to compare two groups. *P* values less than 0.05 were considered significant.

*Microbiome analysis*

16S amplicon sequencing. 16S ribosomal RNA gene sequencing methods were adapted from those developed for the NIH Human Microbiome Project [20](#_ENREF_20),[21](#_ENREF_21) and the Earth Microbiome Project[22](#_ENREF_22). Briefly, total genomic DNA was extracted from tumor samples using commercial kits (RNeasy PowerLyzer Tissue & Cells Kit (QIAGEN)). The 16S rDNA region is amplified via PCR and sequenced on the Illumina MiSeq platform. The primers used for amplification **(**Table below) contain adapters for MiSeq sequencing and single-index barcodes so that the PCR products may be pooled and sequenced directly[23](#_ENREF_23), targeting at least 10,000 reads per sample.

**Illumina platform formats, primers, and PCR product sizes**

| Type of sequencing​ | Machine​ | Format​ | Primers​ | ​ | PCR product size​ |
| --- | --- | --- | --- | --- | --- |
| 16Sv1v3​ | MiSeq​ | 2 x 300 PE​ | 27F​ | AGAGTTTGATYMTGGCTCAG​  Y (C/T)​  M (A/C) | 508 bp​ |
| ​ | ​ | ​ | 534R​ | ATTACCGCGGCKGCTGG ​  K (G/T) |
| 16Sv4​ | MiSeq​ | 2 x 250 PE​ | 515F​ | GTGCCAGCMGCCGCGGTAA​  M (A/C)​ | 292 bp​ |
| ​ | ​ | ​ | 806R​ | GGACTACHVGGGTWTCTAAT ​  H (A/C/T)  V (A/C/G)  W (A/T) |

PE: paired end.

16S amplicon pipeline.Raw data files in BCL format are converted into FASTQ files and demultiplexed based on the single-index barcodes using Illumina bcl2fastq software. Demultiplexed read pairs undergo initial quality filtering using bbduk.sh (BBMap, version 38.82 [24](#_ENREF_24)) for removal of Illumina adapters, PhiX reads, and reads with a Phred quality score below 15 and length below 100 bp after trimming. For 16Sv4 [25](#_ENREF_25), quality-controlled reads are merged using bbmerge.sh (BBMap, version 38.82 [24](#_ENREF_24)) with merge parameters optimized for the 16SV4 amplicon type (maxstrict = t, qtrim = t, and trimq = 15). Merged reads are then further filtered using vsearch[26](#_ENREF_26), allowing for a maximum expected error of 0.05, maximum length of 254 bp, and minimum length of 252 bp. All of the reads are combined into a single FASTA file for further processing. For 16Sv1v3 sequencing, quality-controlled reads are merged using bbmerge.sh (BBMap , version 38.82 [24](#_ENREF_24)) with merge parameters optimized for the 16SV1V3 amplicon type (vstrict = t, qtrim = t, and trimq = 15). Merged reads are then further filtered using vsearch[26](#_ENREF_26), allowing for a maximum expected error of 0.001, maximum length of 550 bp, and minimum length of 450 bp. All of the reads are combined into a single FASTA file for further processing. 16S UPARSE: clustering (default outputs). Resulting reads are clustered into OTUs at a similarity cutoff of 97% via the UPARSE algorithm[27](#_ENREF_27) using an in-house iterative, stepwise approach that includes chimera filtering[28](#_ENREF_28),[29](#_ENREF_29). Briefly, reads are first dereplicated using the vsearch [26](#_ENREF_26) derep_fulllength option and recording of the size to identify singletons. The dereplicated nonsingleton reads are clustered in an iterative stepwise manner in increments of 0.4% using the usearch70 cluster_otus function. Singletons are mapped back to the dereplicated reads using the usearch70 -usearch_global function[30](#_ENREF_30) at 99% identity, and mapped reads are added to the output. The final output is run through the usearch70 uchime_ref program against the GOLD database [28](#_ENREF_28),[29](#_ENREF_29) using only the plus strand and allowing for no chimeras to create a clustered OTU file with no chimeras. The OTU centroids file is mapped against an optimized version of the latest current SILVA database [31](#_ENREF_31) containing only sequences from the respective variant region of the 16S ribosomal RNA gene to determine taxonomies using the usearch70 usearch_global function [30](#_ENREF_30), specifying the identity threshold to 97%. Abundances are recovered by mapping the demultiplexed reads to the OTU file, creating an OTU table in BIOM format, and removing the chimera reads. Phylogeny information contained in the BIOM file is generated by aligning the centroid sequences using MAFFT program [32](#_ENREF_32) and creating a tree using FastTree [33](#_ENREF_33). The BIOM file is summarized, with recording of the number of reads per sample, and merged with a file that is generated for the overall read statistics to produce a final summary file with read statistics and taxonomy information.

ITS2 amplicon pipeline.Raw data files in BCL format were converted into FASTQ files and demultiplexed based on the single-index barcodes using Illumina bcl2fastq software. Demultiplexed read pairs undergo initial quality filtering using bbduk.sh (BBMap, version 38.82[24](#_ENREF_24)) for removal of Illumina adapters, PhiX reads, and reads with a Phred quality score below 15 and length below 100 bp after trimming. Quality-controlled reads are then merged using bbmerge.sh (BBMap, version 38.82 [24](#_ENREF_24)) with merge parameters optimized for the 16SV4 amplicon type (maxloose = t, qtrim = t, and trimq=15). Merged reads are then further filtered using vsearch[26](#_ENREF_26), allowing for a maximum expected error of 0.01, maximum length of 550 bp, and minimum length of 150 bp. All of the reads are combined into a single FASTA file for further processing. ITS2 UPARSE: clustering (default outputs). Reads are clustered into OTUs at a similarity cutoff of 97% via the UPARSE algorithm7 using an in-house iterative, stepwise approach that includes chimera filtering [28](#_ENREF_28),[29](#_ENREF_29). Briefly, reads are first dereplicated using the vsearch[26](#_ENREF_26) derep_fulllength option and recording of the size to identify singletons. The dereplicated nonsingleton reads are clustered in an iterative stepwise manner in increments of 0.2% using the usearch70 cluster_otus function. Singletons are mapped back to the dereplicated reads using the usearch70 -usearch_global at 99% identity, and mapped reads are added to the output. The final output is run through the usearch70 uchime_ref program against the GOLD database [28](#_ENREF_28),[29](#_ENREF_29) using only the plus strand and allowing for no chimeras to create a clustered OTU file

with no chimeras. The OTU centroids file is mapped against the UNITE database [34](#_ENREF_34) to determine taxonomies using the usearch70 usearch_global function [30](#_ENREF_30), specifying the identity threshold to 97%. Abundances are recovered by mapping the demultiplexed reads to the OTU file, creating an OTU table in BIOM format, and removing the chimera reads. Phylogeny information contained in the BIOM file is generated by aligning the centroid sequences with MAFFT [32](#_ENREF_32) and creating a tree using FastTree[33](#_ENREF_33). The BIOM file is summarized, with recording of the number of reads per sample, and merged with a file that is generated for the overall read statistics to produce a final summary file with read statistics and taxonomy information. Agile Toolkit for Incisive Microbial Analyses (ATIMA) is a stand-alone tool for analyzing and visualizing microbiome data sets. The ATIMA software is a web application combining publicly available R packages [33-35](#_ENREF_33) with purpose-written code to import sample data and identify trends in taxa abundance, alpha-diversity, and beta-diversity as they relate to sample metadata. ATIMA enables analysis of rarefied count and nonrarefied relative abundance data. Categorical variables are evaluated using nonparametric Mann-Whitney *U* [36](#_ENREF_36) and Kruskal-Wallis [37](#_ENREF_37) tests for variables with two groups and three or more groups, respectively. Correlations with continuous variables are analyzed using R’s base function for linear regression models (lm). Differences in community composition use the R function vegan:adonis (version 2.5.5) to estimate PERMANOVA *P* values [38](#_ENREF_38),[39](#_ENREF_39). ATIMA heat maps cluster via complete linkage and are generated using the R package pheatmap (version 1.0.12) [40](#_ENREF_40). All *P* values are adjusted for multiple comparisons using the Benjamini-Hochberg formula to control for the false discovery rate [41](#_ENREF_41).

Virome analyses, RNA and DNA Extraction. Viral RNA/DNA extraction was performed using a QIAcube HT system with a QIAamp96 Virus QIAcube HT Kit (QIAGEN) according to the manufacturer’s instructions. Extracted nucleic acids were stored at -80°C until they were subjected to reverse transcription. For reverse transcription, 9.5 μl of extracted RNA/DNA, 3 μl of 25 μM random hexamer primer, and 1 μl of 10 mM dNTPs were added to each reaction. This mixture was incubated at 65°C for 5 min and then cooled to 4°C and incubated for 2 min. Four microliters of 5x First Strand Buffer (250 mM Tris-HCl, pH 8.3, 375 mM KCl, 15 mM MgCl2, 2 μl of 0.1 M dithiothreitol, 0.5 μl of SuperScript II reverse transcriptase) was added to this mixture. The mixture was then incubated at 25°C for 10 min and 42°C for 50 min and inactivated at 70°C for 15 min. The resulting mixture of single-stranded cDNA and double-stranded DNA was purified using the ExoSAP-IT PCR Product Cleanup reagent to remove remaining random primers and other very short DNA fragments. The entire 20-μl reverse transcription-PCR solution was mixed with 2 μl of ExoSAP-IT PCR Product Cleanup reagent, and incubated for 7 min at 37°C and then for another 7 min at 80°C. This purified DNA/cDNA mixture was stored at -20°C until it was subjected to amplification. For amplification, 10 μl of the reverse transcription-PCR mixture was mixed with 4 μl of the BC-V8A2 primer (10 μM; unique barcode for each sample), 2.5 μl of AccuPrime Buffer 1, 0.5 μl of AccuPrime *Taq*, and 9 μl of water. This mixture was subjected to the following PCR program: 95°C for 2 min followed by 40 cycles at 94°C for 30 s, 33°C for 1 s, and then ramping up by 8% to 58°C for 2 min. All PCRs were carried out using an Eppendorf Mastercycler pro S. After amplification, the entire 25-μl barcoded semirandom amplification reaction buffer was mixed with ExoSAP-IT PCR Product Cleanup reagent, and incubated for 7 min at 37°C and then for another 7 min at 80°C. This purified DNA/cDNA mixture was stored at -20°C until sequencing library preparation. Amplicons were diluted to 1 ng/μl, and 25 μl from each pool (100 ng) was used as input for library preparation. A KAPA HyperPrep Kit (Roche) was used for library preparation according to the kit manual instructions. Briefly, the amplicons were end-repaired, and an A-overhang was added and ligated with KAPA index adapters. Postligation products were cleaned up using AMPure beads (bead:library ratio, 0.8:1) and eluted in total volume of 27 μl of nuclease-free water. Next, 25 μl were used for library amplification via three cycles of PCR using KAPA Library Amplification Primer Mix (Roche). The resulting libraries were cleaned up using AMPure beads (bead:library ratio, 1:1) and eluted in total volume of 30 μl of nuclease-free water. For negative controls, 1 ng was used for ligation-based library preparation. Libraries were assayed using a Fragment Analyzer system (Agilent) and quantified using a Qubit fluorometer (Qubit dsDNA HS Assay Kit; Invitrogen) prior to sequencing. For the KAPA ligation-based method, fragment sizes were 512-556 bp. Libraries were diluted to 2 nM. The same volume of each 2-nM library was used to produce an equimolar pool of 24 libraries. Five microliters of the pool was mixed with 5 μl of 0.1 N NaOH and incubated for 5 min at room temperature to denature the double-stranded DNA. PhiX was also denatured using 0.1 N NaOH. The denatured library pool and PhiX were diluted to 10 pM by adding HT1 solution from the NovaSeq 6000 kit. The library pool, HT1 solution, and 5 μl of 20 pM PhiX were mixed to achieve a final library concentration of 8 pM at a total volume of 600 μl. The sequencing was carried out using a NovaSeq 6000 sequencer with a 2 × 150-bp read-length protocol. Sequencing data quality control. Raw FASTQ sequences were processed using BBDuk (https://sourceforge.net/projects/bbmap/; BBMap, version 38.82 [24](#_ENREF_24)) to quality trim, remove Illumina adapters, and filter PhiX reads. Trimming parameters were set to a k-mer length of 19 and a minimum Phred quality score of 25. Reads with a minimum average Phred quality score below 23 and length shorter than 50 bp after trimming were discarded. The trimmed FASTQ sequences were mapped to a combined PhiX (standard Illumina spike in) and human reference genome (GRCh38.p13; GCF_000001405.39) database using bbmap (https://sourceforge.net/projects/bbmap/; BBMap, version 38.82 [24](#_ENREF_24)). Briefly, the trimmed reads were mapped to the reference genome using BBMap with a k-mer length of 15, the bloom filter enabled, and fast search settings to identify and remove hg38/PhiX reads. Trimmed and human-filtered reads were then processed using VirMAP to assess the viral community composition [42](#_ENREF_42).

*Cell culture and* in vitro *assays*

The dorsal root ganglion (DRG) model is based on a technique originally described for prostate cancer cells [43](#_ENREF_43) and modified by our group. Human DRG neurons were prepared as described previously (Amit et al, Nature 2020; PMID: 32051587)and cocultured with either B6, E10 or MOC2 cells. Written informed consent for participation, including use of tissue samples, was obtained from each patient prior to inclusion. The protocol was reviewed and approved by The University of Texas MD Anderson Cancer Center Institutional Review Board, and all experiments conformed to relevant guidelines and regulations. Briefly, each donor was undergoing surgical treatment that necessitated ligation of spinal nerve roots to facilitate tumor resection or spinal reconstruction. Spinal roots were ligated proximal to the DRG, spinal roots were sharply cut both proximal and distal to the DRG, and excised DRG were transferred immediately into cold (∼4°C) and sterile balanced salt solution containing nutrients. DRG were transported to the laboratory on ice in a sterile, sealed 50-mL centrifuge tube. Upon arrival to the laboratory, each ganglion was carefully dissected from the surrounding connective tissues and sectioned into several ∼1- to- 2-mm pieces. DRG were digested in 2 mL of a mixed enzyme solution: 0.1% trypsin (Sigma-Aldrich, T9201), 0.1% collagenase Sigma-Aldrich, C1764; w/v, final concentration), and 0.01% DNase (Sigma-Aldrich, D5025) diluted in DMEM/F-12. The pieces of tissue were transferred to a 37°C rotator to shake at a speed 124-128 revolutions/min. Every 20 minutes, tissue fragments were allowed to settle, and the supernatant/dissociated cells were collected and transferred to DMEM/F-12 with enzyme inhibitor. Supernatant was replaced with 2 mL of fresh digestion solution. The tissue was returned to the 37°C rotator, and this process was repeated until tissue fragments were well digested. Dissociated cells were centrifuged at 180 *rpm* for 5 minutes, supernatant was removed, and the cells were gently resuspended in culture medium with DMEM/F-12 supplemented with EV free 10% serum and 2 mM glutamine. Cells were plated onto laminin-coated µ-Slide 8 Well (ibidi) and cultured at 37°C with 5% CO2 for 24-72 hours prior to undergoing transfection or labeling.

The human HNSCC cell line PCI, IC1, IC18, IC1MET and, IC19 were obtained from the laboratory of Drs. Irene Leigh and Catherine Harwood, UK [44](#_ENREF_44). Murine cells (E10SCC and B6SCC) were obtained from Dr. Kenneth Tsai’s lab. Briefly, these cells have been generated by primary culture of ultraviolet induced skin tumors in SKH1-Elite, hairless, euthymic and immunocompetent mice [45](#_ENREF_45)-[46](#_ENREF_46). The cell lines were maintained in DMEM supplemented with 10% EV-depleted fetal bovine serum (Gibco, Thermo Fisher Scientific), L-glutamine, sodium pyruvate, nonessential amino acids, and vitamin solution and were incubated at 37°C in 5% CO2 and 95% air. All human cell lines were authenticated upon arrival by STR profiling using 14 short tandem repeat (STR) loci including the gender determining locus, Amelogenin. All cells were tested for mycoplasma every 3 months and confirmed to be negative for mycoplasma.

Primary sensory neurons were isolated from TG dissected from 6- to 8-week-old mice as previously described 6. After ganglia dissection, tissue was enzymatically digested with papain (40 U/mL, EMD Millipore) for 20 minutes in 37°C followed by 20 minutes of digestion with collagenase II (4 mg/mL)/dispase II (4.6 mg/mL) solution. Using Percoll gradient, comprising 12.5% and 28% Percoll in complete L-15 medium (L-15 with 5% fetal calf serum, penicillin/streptomycin, HEPES), we separated the myelin and nerve debris from trigeminal neurons. Prior to sorting, neurons were labeled with NeuroFluor™ NeuOMembrane-permeable fluorescent probe for the detection of live neurons according to the manufacturers’ protocol (StemCell Technologies). All flow cytometric analyses were carried out using an LSR II flow cytometer running FACSDiva 8.0 software and FACSAria (all BD Biosciences). Data were analyzed by Kaluza (Beckman Coulter) software.

To assess the impact of nerves or immunotherapy on the neuron degenerative/regenerative status *in vitro*, primary sensory neurons were produced and plated on laminin-coated coverslips. Two hours after plating, 12 wells were flooded with 1 mL of warm (37°C) F-12 culture medium (Sigma-Aldrich) supplemented with 10% EV-depleted fetal bovine serum (Gibco, Thermo Fisher Scientific) and 1% penicillin/streptomycin and incubated at 37°C in 5% CO2 and 95% air. The carcinoma cells were plated (neuron : cancer cells ratio was 1:10), and cultures were grown in Roswell Park Memorial Institute 1640 medium containing 10% EV-depleted fetal bovine serum in 37°C and 5% CO2 incubation conditions, for 72 hours, with or without anti-PD1 antibody (cemiplimab, 1000ug/ml,  or RMP1-14, 100ug/ml, InVivoMAb Antibodies, BioXCell, for human and murine, respectively), prior to neuron sorting and RNA extraction.

Neuron mRNA library preparation and sequencing. RNA was isolated from tumor samples using total RNA was extracted using the RecoverALL™ Total Nucleic Acid Isolation kit (Ambion) according to the manufacturer’s instructions.  RNA libraries were prepared and sequenced at the University of Houston Sequencing and Editing Core as per standard protocols. Enrichment for mRNA from total RNA was performed by coding region-specific biotinylated capture probes, and those were selected using streptavidin magnetic beads. mRNA-enriched libraries were prepared using a QIAseq Stranded Total RNA Kit (QIAGEN) with 200 ng of input RNA. RNA was fragmented, reverse-transcribed into cDNA, ligated with sequence adaptors, and polymerase chain reaction (PCR)-amplified. Size selection for libraries was performed using SPRIselect beads (Beckman Coulter). Library purity was analyzed using the DNA HS1000 tape with a 4200 TapeStation system (Agilent) and using a Qubit fluorometer (Thermo Fisher Scientific). The prepared libraries were pooled and sequenced using a NovaSeq 6000 system (Illumina), generating about 40 million 2 × 150 base paired-end reads per sample.

*Human skin samples, spatial transcriptomics discovery and validation cohorts*

Formalin-fixed paraffin-embedded (FFPE) tissue from additional 16, treatment naïve surgically ressected CSCC samples from the MDACC were used for spatial transcriptomics analysis. Patient characteristics, including age, sex, and treatment, were adjusted for as shown in Extended Data Table 4. All patients underwent local excision and had histologically confirmed squamous cell carcinoma. This study protocol was approved by the MDACC internal review board and sample collection was contingent on patient informed consent.

Surgically resected primary tumors were paraffin embedded and serially sectioned (thickness 5 μm). For each block, a section was stained with H&E to localize normal areas among cancer. For each patient, an unstained slide including the tumor was processed using the Visium (10X genomics) spatial gene expression using *Space Ranger* pipeline (see *Space Ranger below)*. Nerve densities were assessed blind, without knowledge of histological diagnoses or clinical data. For each patient (*n* = 44), see *Spatial sequencing data processing and analysis* for expression data analysis and enrichment score calculation for transcriptional phenotyping (immunosuppressive, anti-tumor immunity and nerve injury; the latter was further categorized to no nerve injury, moderate and substantial enrichment). To assess the magnitude of the association we used a Pearson correlation and Kruskal-Wallis test; logistic regression model, adjusting for the clinical variables, was used to estimate the odds ratios and 95% confidence intervals for the associations between transcriptional programs.

*Spatial transcriptome sequencing (human and humanized mice FFPE samples)*

FFPE samples were tested for RNA quality with an DV200  > 50% (Agilent). The samples were then processed for full spatial transcriptomic (ST) experiment according to the manufacturer’s instructions (10x Genomics, Visium Spatial), cut at 10 μM thickness onto four 6.5 mm × 6.5 mm capture areas with 5,000 oligo-barcoded spots. The slides then were fixed and stained by H&E with immediate imaging on EVOS7000 imaging system (Thermofisher). Tissues were permeabilized with a proprietary enzyme (10 min), and reverse-transcription and second-strand synthesis were performed on the slide, with cDNA quantification using quantitative PCR with reverse transcription (RT–qPCR) using the KAPA SYBR FAST-qPCR kit (KAPA Biosystems), and analysed on the LightCycler480 Real-Time PCR System (Roche). RT–qPCR results (*C*q value at 25% of peak fluorescence) revealed cDNA amplification. Libraries were constructed according to the manufacturer’s instructions. ST libraries were then quantified using the High-Sensitivity DNA Assay 2100 (Agilent). Library purity was analyzed using the DNA HS1000 tape on a Tapestation 4200 (Agilent) and quantified with Qubit Fluorometer (Thermo Fisher). The prepared libraries were pooled and sequenced on a NovaSeq 6000 (Illumina); generating ~40 million 2×150 base paired-end reads per sample.

Spatial sequencing data processing and analysis

The raw spatial sequencing data were processed in the Space Ranger workflow (https://support.10xgenomics.com/spatial-gene-expression/software/pipelines/latest/choosing-how-to-run). The spaceranger (version 1.3.0) mkfastq pipeline was used to convert Illumina sequencer’s binary base call (BCL) files into FASTQ format. Samples were then run through the spaceranger count pipeline, which performs alignment, tissue detection, fiducial detection, and barcode/unique molecular identifier counting. The RNA-seq aligner STAR was used for fresh-frozen samples, and a probe aligner algorithm was used for FFPE samples. Reference sequence alignment of human and humanized mouse samples was performed with the GRCh38 Reference 2020-A (June 23, 2020). Reference sequence alignment of humanized mouse samples also was performed with the mm10 Reference 2020-A (June 23, 2020). Images were processed using Fiji to divide them into individual capture areas and then rotated to align the fiducial spot patterns[47](#_ENREF_47). The pipeline uses Visium spatial barcodes to generate feature-spot matrices, determine clusters, and perform gene expression analysis.

Functions in the R package Seurat (version 4.1.1) were used for downstream analysis[48](#_ENREF_48). Spots that did not overlap with the tissue sections or had ≥ 20% mitochondrial reads (10% for humanized mouse) or had < 200/500 detected genes were removed from the downstream expression analysis. Expression counts were normalized using Seurat’s NormalizeData. The 3000 most variable genes were identified using the FindVariableFeatures function. The normalized expression data were further scaled to mean 0 and variance 1 using the function ScaleData. RunPCA and RunUMAP were used for dimensionality reduction. Sample batch effect correction was performed using RunHarmony. Clustering was done using the functions FindNeighbors and FindClusters. Nerve injury, good immune, and bad immune gene signatures were obtained from the literature[49](#_ENREF_49). Nerve injury genes included *TAGAP*, *KCNJ8*, *COL1A1*, *PECAM1*, *TMEM119*, *ATF3*, *JUN*, *KLF6*, *NOCT*, *LMO7*, *CSF1*, *ENTPD1*, *UCHL1*, *PINK1*, *BHLHE41*, *ITGAM*, *CHL1*, *SNCA*, *SCPEP1*, and *VEGFA*. Anti-tumor immunity genes included *CD8A*, *PRF1*, *GZMB*, *IL12A*, *IFNG*, *IRF8*, *CD86*, *NOS2*, *TNF*, and *IL2*. Immuno-suppressive genes included *IDO1*, *CTLA4*, *FOXP3*, *IL10*, *IL6*, *CD163*, *MSR1*, *MRC1*, *PDCD1*, *PDCD1LG2*, and *CD274*. The gene signature scores were calculated for all spots using the Seurat AddModuleScore function[50](#_ENREF_50). Spatial feature expression plots were generated using the SpatialFeaturePlot function. Pearson correlation coefficients were calculated for signature scores. In addition, we categorized the spots into three groups using 0 and the average of the positive values as the two cutoff values based on the nerve injury scores, and then generated violin plots to show the relationship between good/bad immune scores with the nerve injury groups. One-way ANOVA and Tukey’s post hoc tests were applied to assess the significance of the group difference. In another way, we generated bar plots to examine the difference in percentage of positive immune phenotype scores between nerve injury groups. The overall Chi-squared test and pairwise proportional/chi-squared tests with Bonferroni correction were applied to test for statistical significance.

*Micro-electrode Array (MEA)*

Mouse tumors were quickly dissected from euthanized animals (orthotopic B6 intradermal model in SKH animals and normal skin controls) and analyzed by Dr. Paola Vermeer’s as previously described (Restaino et al. Sci Adv. 2023 May; PMID: 37163587). Tissues were immediately sectioned to generate tissue slices. One tumor slice/sample was formalin fixed, paraffin-embedded and processed for histological staining (H&E) to assess for the presence of tumor. Electrical recordings were captured using an MEA1060-Inv-BC microelectrode array system (Multichannel Systems) with a perforated microelectrode array, 60pMEA100/30iR-Ti MEAs (cat # 890335, Harvard Apparatus). The MEAs utilized contained 60 electrodes, of which one is a reference electrode. These electrodes are spaced 100 µm apart in a 6 x 10 grid (10 electrodes/row arranged in 6 columns generating a rectangle of electrodes onto which tissue slice is placed); each electrode is 30 µm in diameter. The titanium nitride electrodes are contained within a glass ring enabling us to maintain tissue slices under oxygenated (95% O2, 5% CO2) Artificial Cerebrospinal Fluid (ACSF: 119 mM NaCl, 2.5 mM KCl, 1 mM NaH2PO4, 26.2 mM NaHCO3, 11 mM glucose, 1.3 mM MgSO4, 1.5 mM CaCl2); this buffer preserves neuronal functions. The perforated MEAs allow for a gentle suction (applied by a vacuum pump) to keep the tissue slice in contact with electrodes for the duration of recordings. This enables us to capture the electrical activity from every electrode for every second of each recording. As such, recordings from 59 electrodes/second/slice were collected (one electrode is a reference electrode). Recordings occurred at room temperature using a 25-kHz sampling frequency and a Butterworth 2nd order digital filter set to high pass with a cutoff frequency of 10 Hz (to eliminate slow field potentials). A STG4000 stimulus generator (Multichannel Systems) was utilized for stimulation which consisted of biphasic voltage, -0.5V and + 0.5V each for 100µs and repeated after a 23ms interval. Stimulation was applied to selected electrodes; evoked spike responses were recorded. Two independent types of stimulations were utilized on each slice. The first consisted of 14 electrodes while the second consisted of 20 electrodes. The same electrode sets were stimulated for all slices analyzed and the stimulation parameters were identical. Recordings continued after electrical stimulations were turned off to allow for capturing of activity back to baseline. In all cases, continuous recordings of electrical activity/second/electrode were captured and analyzed using the MC_Rach4.6.2 software (Multichannel Systems).

*Statistical analysis*

The unpaired, Wilcoxon or Kruskal-Wallis followed by post-hoc test were carried out to analyze immunohistochemical, in vitro and mouse data. Survival was analyzed by the Kaplan–Meier method and compared using the log-rank test. *P* values of less than 0.05 were considered to indicate nominal statistical significance. Because of the variance of xenograft growth in control mice, we used at least three mice per genotype to give 80% power to detect an effect size of 20% with a significance level of 0.05. For all mouse experiments, the number of independent mice used is listed in the figure legend. No statistical methods were used to predetermine sample size. The experiments were not randomized, and investigators were not blinded to allocation during experiments and outcome assessment.

*Animals and in vivo procedures*

SKH1-elite and humanized CD34+ (huCD34) mice were obtained from Charles River. All animal studies were carried out according to protocols approved by The University of Texas MD Anderson Cancer Center Institutional Animal Care and Use Committee. Mouse housing, husbandry, and care practices met or exceeded the minimum requirements set forth in the Animal Welfare Act and the Guide for the Care and Use of Laboratory Animals (8th Edition). Disease development and progression were closely monitored, and mice with metastases were euthanized as soon as we noticed signs of discomfort in the mice or when the largest dimension of a tumor reached 10 mm, according to our approved protocol. In none of the experiments were these limits exceeded.

Orthotopic human tumors were implanted by injection of 2 × 105 HNSCC cells suspended in 30 µl serum-free medium into the skin (intrademally) of 6- to 8-week-old mice and were monitored three times per week as previously described [51](#_ENREF_51). For the humanized mouse models, we used a human leukocyte antigen (HLA)-matched donor to engraft the mouse according to the human HNSCC cells. The human cell line HLA was tested at the Histocompatibility Typing Laboratory at the Hematopoietic Stem Cell Transplant program of MD Anderson Cancer Center. All animals underwent a full skin examination three times per week and were killed for tissue retrieval approximately 4 weeks after tumor cell injection.

For the assessment of in vivo nerve injury modulation of the immune response, we used denervation and surgical axotomy. Briefly, mice were anaesthetized, and skin was prepared. For denervation, under a microscope guidance, we made an incision along the dorsal midline from the base of the neck to roughly 0.5 cm above the tail. Using blunt forceps, we gently reflected the skin on the right side away from the flank to visualize the underlying tissue from the scapular fat pads near the neck to just above the hind limb. Next, we removed the nerves exclusively from the right side of the animal located at anatomical sites T3-12 by plucking from where the segments bend at the trunk wall to their entry sites into the skin. Then we remove any nerves from the skin flap.

For axotomy, we made an incision along the dorsal midline from the base of the neck to roughly 0.5 cm above the tail. Using blunt forceps, we gently reflected the skin on the right side away from the flank to visualize the underlying tissue from the scapular fat pads near the neck to just above the hind limb. Next, we used a scalpel to sever the nerves innervating the skin located at anatomical sites T3-12 where the segments bend at the trunk wall to their entry sites into the skin. We did not pluck the nerves or remove any nerves from the skin flap.

For the sham-operated control we used blunt dissection, to gently reflect the skin on the right side of the dorsal midline incision, without removing or cutting the nerves. One week after tumor implantation, mice were treated biweekly with either murine anti-PD1 (i.p., 250 μg, RMP114) or human anti-PD1 (i.p., 10mg/kg, cemiplimab) for 4 weeks [52](#_ENREF_52),[53](#_ENREF_53). IgG2a isotype was used as control.

For the demyelination in vivo studies, we used EtBr to induce focal demyelination at the TME as previously described [54-56](#_ENREF_54), one week after orthotopically injecting B6 cells intradermally. 48 hours after demyelination, mice were treated with either murine anti-PD1 (i.p., 250 μg, RMP114) or IgG control twice a week. Starting on dose 3 of anti-PD1 treatment, mice were randomized for 6 cycles of concurrent anti-IFN-1R Ab (clone # MAR1-5A3, InVivoMAb anti-mouse IFNAR-1, BioXcell, 2 loading dose (500μg/mouse) followed by maintenance 250μg/mouse intraperitoneally (i.p.)), anti-IL6R Ab (clone #15A7, InVivoMAb anti-mouse IL-6R, BioXcell, 200 μg/mouse, i.p.) or IgG2 control treatment.

Differences in tumor volume at last day of experiment among animal groups were assessed by Kruskal-Wallis follow-up by post-hoc test or Mann-Whitney test. Spatial transcriptomic sample processing, data acquisition and analysis of huCD34+ mice HNSCC model was done as described above (see *Spatial transcriptome sequencing (human and humanized mice FFPE samples))*

**References**

1 Broad Institute TCGA Genome Data Analysis Center. *Analysis-ready standardized TCGA data from Broad GDAC Firehose 2016_01_28 run*, <<https://doi.org/10.7908/C11G0KM9>> (2018).

2 Liu, J. *et al.* An Integrated TCGA Pan-Cancer Clinical Data Resource to Drive High-Quality Survival Outcome Analytics. *Cell* **173**, 400-416 e411, doi:10.1016/j.cell.2018.02.052 (2018).

3 Reich, M. *et al.* GenePattern 2.0. *Nat Genet* **38**, 500-501, doi:10.1038/ng0506-500 (2006).

4 Subramanian, A. *et al.* Gene set enrichment analysis: a knowledge-based approach for interpreting genome-wide expression profiles. *Proc Natl Acad Sci U S A* **102**, 15545-15550, doi:10.1073/pnas.0506580102 (2005).

5 Barbie, D. A. *et al.* Systematic RNA interference reveals that oncogenic KRAS-driven cancers require TBK1. *Nature* **462**, 108-112, doi:10.1038/nature08460 (2009).

6 Kohler, S. *et al.* The Human Phenotype Ontology in 2021. *Nucleic Acids Res* **49**, D1207-D1217, doi:10.1093/nar/gkaa1043 (2021).

7 Prat, A. *et al.* Immune-Related Gene Expression Profiling After PD-1 Blockade in Non-Small Cell Lung Carcinoma, Head and Neck Squamous Cell Carcinoma, and Melanoma. *Cancer Res* **77**, 3540-3550, doi:10.1158/0008-5472.CAN-16-3556 (2017).

8 Eisenhauer, E. A. *et al.* New response evaluation criteria in solid tumours: revised RECIST guideline (version 1.1). *Eur J Cancer* **45**, 228-247, doi:10.1016/j.ejca.2008.10.026 (2009).

9 Tetzlaff, M. T. *et al.* Pathological assessment of resection specimens after neoadjuvant therapy for metastatic melanoma. *Ann Oncol* **29**, 1861-1868, doi:10.1093/annonc/mdy226 (2018).

10 Cottrell, T. R. *et al.* Pathologic features of response to neoadjuvant anti-PD-1 in resected non-small-cell lung carcinoma: a proposal for quantitative immune-related pathologic response criteria (irPRC). *Ann Oncol* **29**, 1853-1860, doi:10.1093/annonc/mdy218 (2018).

11 Lindskrog, S. *et al.* An integrated multi-omics analysis identifies prognostic molecular subtypes of non-muscle-invasive bladder cancer. *Nature Communications* **12**, 2301, doi:10.1038/s41467-021-22465-w (2021).

12 Taber, A. *et al.* Molecular Correlates of Cisplatin-based Chemotherapy Response in Muscle Invasive Bladder Cancer by Integrated Multi-omics Analysis. *Urologic Oncology: Seminars and Original Investigations* **38**, 899, doi:10.1016/j.urolonc.2020.10.031 (2020).

13 NanoString, I. *GeoMx® DSP Automated Slide Preparation User Manual*, <<https://university.nanostring.com/geomx-dsp-automated-slide-preparation-user-manual/1209595>> (2022).

14 Institute, B. *BITGDA: Analysis-ready standardized TCGA data from Broad GDAC Firehose* 2016).

15 NanoString. (2022).

16 Bu, D. *et al.* KOBAS-i: intelligent prioritization and exploratory visualization of biological functions for gene enrichment analysis. *Nucleic Acids Res* **49**, W317-W325, doi:10.1093/nar/gkab447 (2021).

17 Liebermeister, W. *et al.* Visual account of protein investment in cellular functions. *Proc Natl Acad Sci U S A* **111**, 8488-8493, doi:10.1073/pnas.1314810111 (2014).

18 Otto, A. *et al.* Systems-wide temporal proteomic profiling in glucose-starved Bacillus subtilis. *Nat Commun* **1**, 137, doi:10.1038/ncomms1137 (2010).

19 Bernhardt J, F. S., Hecker M, Siebourg J pp 233-241 (2009).

20 Human Microbiome Project, C. Structure, function and diversity of the healthy human microbiome. *Nature* **486**, 207-214, doi:10.1038/nature11234 (2012).

21 Human Microbiome Project, C. A framework for human microbiome research. *Nature* **486**, 215-221, doi:10.1038/nature11209 (2012).

22 Thompson, L. R. *et al.* A communal catalogue reveals Earth's multiscale microbial diversity. *Nature* **551**, 457-463, doi:10.1038/nature24621 (2017).

23 Caporaso, J. G. *et al.* Ultra-high-throughput microbial community analysis on the Illumina HiSeq and MiSeq platforms. *ISME J* **6**, 1621-1624, doi:10.1038/ismej.2012.8 (2012).

24 Bushnell, B., Rood, J. & Singer, E. BBMerge – Accurate paired shotgun read merging via overlap. *PLOS ONE* **12**, e0185056, doi:10.1371/journal.pone.0185056 (2017).

25 Amir, A. *et al.* Deblur Rapidly Resolves Single-Nucleotide Community Sequence Patterns. *Msystems* **2**, doi:ARTN e00191-1610.1128/mSystems.00191-16 (2017).

26 Rognes, T., Flouri, T., Nichols, B., Quince, C. & Mahe, F. VSEARCH: a versatile open source tool for metagenomics. *PeerJ* **4**, e2584, doi:10.7717/peerj.2584 (2016).

27 Edgar, R. C. UPARSE: highly accurate OTU sequences from microbial amplicon reads. *Nat Methods* **10**, 996-998, doi:10.1038/nmeth.2604 (2013).

28 Edgar, R. C., Haas, B. J., Clemente, J. C., Quince, C. & Knight, R. UCHIME improves sensitivity and speed of chimera detection. *Bioinformatics* **27**, 2194-2200, doi:10.1093/bioinformatics/btr381 (2011).

29 Kyrpides, N. C. Genomes OnLine Database (GOLD 1.0): a monitor of complete and ongoing genome projects world-wide. *Bioinformatics* **15**, 773-774, doi:10.1093/bioinformatics/15.9.773 (1999).

30 Edgar, R. C. Search and clustering orders of magnitude faster than BLAST. *Bioinformatics* **26**, 2460-2461, doi:10.1093/bioinformatics/btq461 (2010).

31 Quast, C. *et al.* The SILVA ribosomal RNA gene database project: improved data processing and web-based tools. *Nucleic Acids Res* **41**, D590-596, doi:10.1093/nar/gks1219 (2013).

32 Katoh, K. & Toh, H. Parallelization of the MAFFT multiple sequence alignment program. *Bioinformatics* **26**, 1899-1900, doi:10.1093/bioinformatics/btq224 (2010).

33 Price, M. N., Dehal, P. S. & Arkin, A. P. FastTree 2--approximately maximum-likelihood trees for large alignments. *PLoS One* **5**, e9490, doi:10.1371/journal.pone.0009490 (2010).

34 Nilsson, R. H. *et al.* The UNITE database for molecular identification of fungi: handling dark taxa and parallel taxonomic classifications. *Nucleic Acids Res* **47**, D259-D264, doi:10.1093/nar/gky1022 (2019).

35 Edgar, R. C. *UNOISE2: improved error-correction for Illumina 16S and ITS amplicon sequencing* (Cold Spring Harbor Laboratory, 2016).

36 Mann, H. B. & Whitney, D. R. On a Test of Whether one of Two Random Variables is Stochastically Larger than the Other. *The Annals of Mathematical Statistics* **18**, 50-60, 11 (1947).

37 Kruskal, W. H. & Wallis, W. A. Use of Ranks in One-Criterion Variance Analysis. *Journal of the American Statistical Association* **47**, 583-621, doi:10.2307/2280779 (1952).

38 Paradis, E., Claude, J. & Strimmer, K. APE: Analyses of Phylogenetics and Evolution in R language. *Bioinformatics* **20**, 289-290, doi:10.1093/bioinformatics/btg412 (2004).

39 Oksanen, J. *et al.* Vegan: Community Ecology Package. *R Package Version 2.2-1* **2**, 1-2 (2015).

40 Kolde, R. Pheatmap: pretty heatmaps. *R package version* **1**, 726 (2012).

41 Benjamini, Y. & Hochberg, Y. Controlling the False Discovery Rate: A Practical and Powerful Approach to Multiple Testing. *Journal of the Royal Statistical Society: Series B (Methodological)* **57**, 289-300, doi:<https://doi.org/10.1111/j.2517-6161.1995.tb02031.x> (1995).

42 Ajami, N. J., Wong, M. C., Ross, M. C., Lloyd, R. E. & Petrosino, J. F. Maximal viral information recovery from sequence data using VirMAP. *Nature Communications* **9**, doi:10.1038/s41467-018-05658-8 (2018).

43 Ayala, G. E. *et al.* In vitro dorsal root ganglia and human prostate cell line interaction: redefining perineural invasion in prostate cancer. *Prostate* **49**, 213-223, doi:10.1002/pros.1137 (2001).

44 Hassan, S. *et al.* A Unique Panel of Patient-Derived Cutaneous Squamous Cell Carcinoma Cell Lines Provides a Preclinical Pathway for Therapeutic Testing. *Int J Mol Sci* **20**, doi:10.3390/ijms20143428 (2019).

45 Fu, J. *et al.* Enhanced UV-induced skin carcinogenesis in transgenic mice overexpressing proprotein convertases. *Neoplasia* **15**, 169-179, doi:10.1593/neo.121846 (2013).

46 River, C. [*https://www.criver.com/products-services/find-model/skh1-elite-mouse?region=3646*](https://www.criver.com/products-services/find-model/skh1-elite-mouse?region=3646), <<https://www.criver.com/products-services/find-model/skh1-elite-mouse?region=3646>> (

47 Schindelin, J. *et al.* Fiji: an open-source platform for biological-image analysis. *Nature Methods* **9**, 676-682, doi:10.1038/Nmeth.2019 (2012).

48 Hao, Y. H. *et al.* Integrated analysis of multimodal single-cell data. *Cell* **184**, 3573-+, doi:10.1016/j.cell.2021.04.048 (2021).

49 Renthal, W. *et al.* Transcriptional Reprogramming of Distinct Peripheral Sensory Neuron Subtypes after Axonal Injury. *Neuron* **108**, 128-+, doi:10.1016/j.neuron.2020.07.026 (2020).

50 Tirosh, I. *et al.* Dissecting the multicellular ecosystem of metastatic melanoma by single-cell RNA-seq. *Science* **352**, 189-196, doi:10.1126/science.aad0501 (2016).

51 Myers, J. N., Holsinger, F. C., Jasser, S. A., Bekele, B. N. & Fidler, I. J. An orthotopic nude mouse model of oral tongue squamous cell carcinoma. *Clin Cancer Res* **8**, 293-298 (2002).

52 Curran, M. A., Montalvo, W., Yagita, H. & Allison, J. P. PD-1 and CTLA-4 combination blockade expands infiltrating T cells and reduces regulatory T and myeloid cells within B16 melanoma tumors. *Proc Natl Acad Sci U S A* **107**, 4275-4280, doi:10.1073/pnas.0915174107 (2010).

53 Burova, E. *et al.* Preclinical Development of the Anti-LAG-3 Antibody REGN3767: Characterization and Activity in Combination with the Anti-PD-1 Antibody Cemiplimab in Human PD-1xLAG-3-Knockin Mice. *Mol Cancer Ther* **18**, 2051-2062, doi:10.1158/1535-7163.MCT-18-1376 (2019).

54 Kuypers, N. J., James, K. T., Enzmann, G. U., Magnuson, D. S. & Whittemore, S. R. Functional consequences of ethidium bromide demyelination of the mouse ventral spinal cord. *Exp Neurol* **247**, 615-622, doi:10.1016/j.expneurol.2013.02.014 (2013).

55 Goudarzvand, M. *et al.* Focal Injection of Ethidium Bromide as a Simple Model to Study Cognitive Deficit and Its Improvement. *Basic Clin Neurosci* **7**, 63-72 (2016).

56 Merrill, J. E. In vitro and in vivo pharmacological models to assess demyelination and remyelination. *Neuropsychopharmacology* **34**, 55-73, doi:10.1038/npp.2008.145 (2009).
