# Supplementary material for: Inflammation induced by tumor-associated nerves promotes resistance to anti-PD-1 therapy in cancer patients and is targetable by IL-6 blockade
Source: Research Square preprint supplement (doi:10.21203/rs.3.rs-3161761/v1), 2023-07-18
Supplement: Supplementary file 3 [file 39b2321fcafab5bebb8df661.xlsx]

## Sheet: Sheet1
Univariate
Immune high group	Univariate							Multivariate
PFI			HR	Lower CI 95%	UpperCI 95%	Wald pv				HR	Lower CI 95%	UpperCI 95%	Wald pv
PFI (events = 44, censored = 98)	Nerve injury siganature	Nerve injured-enriched vs non-enriched	2.15	1.16	3.98	0.0146		Nerve injury siganature	Nerve injured-enriched vs non-enriched	1.97	1.03	3.78	0.0396
	Age		1	0.97	1.03	0.6604		Age		0.99	0.95	1.02	0.2548
	Sex	Male vs Female	0.59	0.32	1.1	0.0981		Sex	Male vs Female	0.66	0.33	1.33	0.2548
	Clinical stage	II vs III	1.38	0.5	3.79	0.69		Clinical stage	II vs III
		II vs IV	0.93	0.45	1.93				II vs IV
		III vs IV	0.67	0.28	1.64				III vs IV
	HPV status	HPV- vs HPV+	1.68	0.8	3.5	0.1657		HPV status	HPV- vs HPV+	1.19	0.28	5.1	0.8087
	Anatomical location	OC vs LH	1.92	0.87	4.21	0.0997		Anatomical location	OC vs LH	1.41	0.6	3.32	0.6883
		OC vs OP	1.99	0.91	4.39				OC vs OP	1.4	0.31	6.35
		OP vs LH	0.96	0.35	2.56				OP vs LH	1.01	0.2	5.04
	PNI	PNI+ vs PNI-	1.67	0.74	3.74	0.2099		PNI	PNI+ vs PNI-
Immune high group	Univariate							Multivariate
OS			HR	Lower CI 95%	UpperCI 95%	Wald pv				HR	Lower CI 95%	UpperCI 95%	Wald pv
OS (events = 43, censored = 99)	Nerve injury siganature	Nerve injured-enriched vs non-enriched	1.62	0.84	3.11	0.1456		Nerve injury siganature	Nerve injured-enriched vs non-enriched	0.95	0.39	2.31	0.9122
	Age		1.02	0.99	1.05	0.1074		Age		0.99	1.04	1	0.8773
	Sex	Male vs Female	0.52	0.28	0.96	0.0383		Sex	Male vs Female	1.03	0.43	2.47	0.9357
	Clinical stage	II vs III	0.83	0.31	2.21	0.8988		Clinical stage	II vs III	0.71	0.19	2.58	0.4217
		II vs IV	0.83	0.38	1.84				II vs IV	0.5	0.17	1.45
		III vs IV	1	0.45	2.21				III vs IV	0.71	0.25	1.97
	HPV status	HPV- vs HPV+	2.8	1.18	6.63	0.0194		HPV status	HPV- vs HPV+	1.29	0.22	7.54	0.7768
	Anatomical location	OC vs LH	1.49	0.72	3.1	0.0739		Anatomical location	OC vs LH	1.82	0.61	5.36	0.5471
		OC vs OP	2.7	1.11	6.53				OC vs OP	1.49	0.17	12.73
		OP vs LH	0.55	0.2	1.53				OP vs LH	1.22	0.13	10.9
	PNI	PNI+ vs PNI-	2.45	1.16	5.18	0.0181		PNI	PNI+ vs PNI-	2.22	0.94	5.25	0.0681
Immune high group	Univariate							Multivariate
DFI			HR	Lower CI 95%	UpperCI 95%	Wald pv				HR	Lower CI 95%	UpperCI 95%	Wald pv
DFI (events = 10, censored = 26)	Nerve injury siganature	Nerve injured-enriched vs non-enriched	4.2	1.2	14.6	0.0239		Nerve injury siganature	Nerve injured-enriched vs non-enriched	4.27	1.002	18.24	0.0496
	Age		0.99	0.95	1.05	0.9069		Age		0.96	1.01	1.04	0.1477
	Sex	Male vs Female	0.46	0.13	1.65	0.2363		Sex	Male vs Female
	Clinical stage	II vs III	0.9	0.25	3.2	0.8725		Clinical stage	II vs III
	HPV status	HPV- vs HPV+	3.56	0.45	28.15	0.2287		HPV status	HPV- vs HPV+
	Anatomical location	OC vs LH/OP	4.39	0.55	34.7	0.1607		Anatomical location	OC vs LH/OP	4.02	0.43	37.6	0.2229
	PNI	PNI+ vs PNI-	1.61	0.39	6.56	0.5064		PNI	PNI+ vs PNI-
