# Supplementary material for: Inflammation induced by tumor-associated nerves promotes resistance to anti-PD-1 therapy in cancer patients and is targetable by IL-6 blockade
Source: Research Square preprint supplement (doi:10.21203/rs.3.rs-3161761/v1), 2023-07-18
Supplement: Supplementary file 4 [file 4cda5fb66d914ef2e6373bc9.xlsx]

## Sheet: Virome read counts
Response	Raw_reads	LowQual_removed	Reads_after_trim	Host_mapped	Virmap_Input	% VirMAP_Input	Viral Reads
NR	3919456	2414632	1504824	1499500	5324	0.0035	#N/A
NR	32	28	4	4	0	0	#N/A
NR	177049878	86265566	90784312	89820730	963582	0.0106	#N/A
NR	32864424	15438354	17426070	17410202	15868	0.0009	#N/A
NR	17899352	5775784	12123568	12117898	5670	0.0005	4
NR	14868254	9052188	5816066	5810742	5324	0.0009	0
NR	7032968	4289578	2743390	2735130	8260	0.003	#N/A
NR	208977860	136821856	72156004	72089282	66722	0.0009	0
NR	37157174	14884560	22272614	22138588	134026	0.006	0
NR	67161170	28165356	38995814	38930390	65424	0.0017	#N/A
NR	24315546	10444570	13870976	13855118	15858	0.0011	#N/A
NR	34569894	16611338	17958556	17923912	34644	0.0019	#N/A
R	118855930	64248388	54607542	54321730	285812	0.0052	0
R	29500536	12631914	16868622	16831544	37078	0.0022	#N/A
R	115821254	61962024	53859230	53804982	54248	0.001	0
R	141745520	44642546	97102974	96965748	137226	0.0014	9
R	7648308	2964266	4684042	4674084	9958	0.0021	#N/A
R	7566912	3568202	3998710	3982550	16160	0.004	#N/A
R	6647214	2769960	3877254	3857406	19848	0.0051	#N/A
R	120487534	50596186	69891348	69635264	256084	0.0037	#N/A
R	229993702	129550324	100443378	100349730	93648	0.0009	0
R	160312946	76848048	83464898	83300288	164610	0.002	#N/A
R	122452278	47413370	75038908	74871266	167642	0.0022	#N/A
R	2015272	1325640	689632	688694	938	0.0014	#N/A
R	20446060	9704284	10741776	10713944	27832	0.0026	0
R	124458	77212	47246	46208	1038	0.022	#N/A
R	4352162	2951116	1401046	1361216	39830	0.0284	#N/A
R	96936	64556	32380	32250	130	0.004	#N/A
R	59444	34154	25290	24678	612	0.0242	#N/A
R	162203532	57270766	104932766	104849000	83766	0.0008	#N/A
R	22774896	11324604	11450292	11137596	312696	0.0273	#N/A
R	2137174	1067982	1069192	1066648	2544	0.0024	#N/A
R	37135804	15425322	21710482	21690268	20214	0.0009	#N/A
R	4491510	1937504	2554006	2550452	3554	0.0014	#N/A
R	324628366	116626060	208002306	207744170	258136	0.0012	#N/A
R	130394158	50792302	79601856	79553884	47972	0.0006	#N/A
R	3738346	2165166	1573180	1572662	518	0.0003	0
R	9767364	5407970	4359394	4355852	3542	0.0008	#N/A
R	1613816	671544	942272	939566	2706	0.0029	#N/A
R	4549944	1753736	2796208	2788424	7784	0.0028	0
R	16688	9196	7492	7432	60	0.008	#N/A
