# Supplementary material for: Inflammation induced by tumor-associated nerves promotes resistance to anti-PD-1 therapy in cancer patients and is targetable by IL-6 blockade
Source: Research Square preprint supplement (doi:10.21203/rs.3.rs-3161761/v1), 2023-07-18
Supplement: Supplementary file 5 [file 717203b293e471b9785ce83c.xlsx]

## Sheet: Extended Table 2_newST1
Name	Chromosome	Region	Max group mean	Log? fold change	Fold change	P-value	FDR p-value	Bonferroni	GeneID	HGNC
OASL	12	complement(121018882..121039242)	21.5134	-0.711359	-1.63735	0	0	0	https://www.ncbi.nlm.nih.gov/entrez/query.fcgi?db=gene&cmd=Retrieve&dopt=full_report&list_uids=8638	https://www.genenames.org/data/gene-symbol-report/#!/hgnc_id/HGNC:HGNC:8090
RN7SL1	14	49586580..49586878	702.366	0.582083	1.49701	0	0	0	https://www.ncbi.nlm.nih.gov/entrez/query.fcgi?db=gene&cmd=Retrieve&dopt=full_report&list_uids=6029	https://www.genenames.org/data/gene-symbol-report/#!/hgnc_id/HGNC:HGNC:10038
CDC27P9	21	complement(8239234..8243081)	5.6958	1.86015	3.63045	0	0	0	https://www.ncbi.nlm.nih.gov/entrez/query.fcgi?db=gene&cmd=Retrieve&dopt=full_report&list_uids=102723570	https://www.genenames.org/data/gene-symbol-report/#!/hgnc_id/HGNC:HGNC:51759
CCL5	17	complement(35871491..35880373)	11.4999	-0.844996	-1.79626	1.11e-16	7.13e-13	2.852e-12	https://www.ncbi.nlm.nih.gov/entrez/query.fcgi?db=gene&cmd=Retrieve&dopt=full_report&list_uids=6352	https://www.genenames.org/data/gene-symbol-report/#!/hgnc_id/HGNC:HGNC:10632
NDRG1	8	complement(133237171..133297587)	40.0596	-0.547672	-1.46173	2.22e-15	1.141e-11	5.704e-11	https://www.ncbi.nlm.nih.gov/entrez/query.fcgi?db=gene&cmd=Retrieve&dopt=full_report&list_uids=10397	https://www.genenames.org/data/gene-symbol-report/#!/hgnc_id/HGNC:HGNC:7679
APLN	X	complement(129645259..129654956)	5.26836	-0.755626	-1.68836	7.661e-15	3.28e-11	1.968e-10	https://www.ncbi.nlm.nih.gov/entrez/query.fcgi?db=gene&cmd=Retrieve&dopt=full_report&list_uids=8862	https://www.genenames.org/data/gene-symbol-report/#!/hgnc_id/HGNC:HGNC:16665
MMP9	20	46008908..46016561	43.0791	-0.532191	-1.44612	1.198e-13	4.396e-10	3.077e-09	https://www.ncbi.nlm.nih.gov/entrez/query.fcgi?db=gene&cmd=Retrieve&dopt=full_report&list_uids=4318	https://www.genenames.org/data/gene-symbol-report/#!/hgnc_id/HGNC:HGNC:7176
ISG15	1	1013467..1014540	197.039	-0.515914	-1.4299	2.337e-13	7.504e-10	6.003e-09	https://www.ncbi.nlm.nih.gov/entrez/query.fcgi?db=gene&cmd=Retrieve&dopt=full_report&list_uids=9636	https://www.genenames.org/data/gene-symbol-report/#!/hgnc_id/HGNC:HGNC:4053
RN7SL2	14	complement(49862551..49862849)	1343.67	0.472312	1.38733	2.403e-12	6.859e-09	6.173e-08	https://www.ncbi.nlm.nih.gov/entrez/query.fcgi?db=gene&cmd=Retrieve&dopt=full_report&list_uids=378706	https://www.genenames.org/data/gene-symbol-report/#!/hgnc_id/HGNC:HGNC:23134
HMGCS1	5	complement(43287470..43313512)	12.8173	0.509646	1.4237	3.736e-12	9.597e-09	9.597e-08	https://www.ncbi.nlm.nih.gov/entrez/query.fcgi?db=gene&cmd=Retrieve&dopt=full_report&list_uids=3157	https://www.genenames.org/data/gene-symbol-report/#!/hgnc_id/HGNC:HGNC:5007
MACC1	7	complement(20134655..20217390)	5.20071	0.53567	1.44962	6.535e-12	1.526e-08	1.679e-07	https://www.ncbi.nlm.nih.gov/entrez/query.fcgi?db=gene&cmd=Retrieve&dopt=full_report&list_uids=346389	https://www.genenames.org/data/gene-symbol-report/#!/hgnc_id/HGNC:HGNC:30215
MMP10	11	complement(102770502..102780628)	13.1905	-0.606632	-1.5227	8.572e-12	1.835e-08	2.202e-07	https://www.ncbi.nlm.nih.gov/entrez/query.fcgi?db=gene&cmd=Retrieve&dopt=full_report&list_uids=4319	https://www.genenames.org/data/gene-symbol-report/#!/hgnc_id/HGNC:HGNC:7156
IFIT2	10	89301949..89309276	18.9783	-0.5031	-1.41726	1.449e-11	2.863e-08	3.721e-07	https://www.ncbi.nlm.nih.gov/entrez/query.fcgi?db=gene&cmd=Retrieve&dopt=full_report&list_uids=3433	https://www.genenames.org/data/gene-symbol-report/#!/hgnc_id/HGNC:HGNC:5409
PTGS2	1	complement(186671812..186680427)	12.1197	-0.501384	-1.41557	4.83e-11	8.863e-08	1.241e-06	https://www.ncbi.nlm.nih.gov/entrez/query.fcgi?db=gene&cmd=Retrieve&dopt=full_report&list_uids=5743	https://www.genenames.org/data/gene-symbol-report/#!/hgnc_id/HGNC:HGNC:9605
CBS	21	complement(43053190..43076868)	1.81578	-1.00328	-2.00456	7.99e-11	1.368e-07	2.052e-06	https://www.ncbi.nlm.nih.gov/entrez/query.fcgi?db=gene&cmd=Retrieve&dopt=full_report&list_uids=875	https://www.genenames.org/data/gene-symbol-report/#!/hgnc_id/HGNC:HGNC:1550
COL1A1	17	complement(50184096..50201648)	288.277	-0.412445	-1.33094	4.654e-10	7.473e-07	1.196e-05	https://www.ncbi.nlm.nih.gov/entrez/query.fcgi?db=gene&cmd=Retrieve&dopt=full_report&list_uids=1277	https://www.genenames.org/data/gene-symbol-report/#!/hgnc_id/HGNC:HGNC:2197
GALNT5	2	157257548..157318491	1.94386	0.558734	1.47298	1.142e-09	1.726e-06	2.934e-05	https://www.ncbi.nlm.nih.gov/entrez/query.fcgi?db=gene&cmd=Retrieve&dopt=full_report&list_uids=11227	https://www.genenames.org/data/gene-symbol-report/#!/hgnc_id/HGNC:HGNC:4127
COL18A1	21	45405137..45513720	8.08616	-0.458042	-1.37368	1.654e-09	2.36e-06	4.249e-05	https://www.ncbi.nlm.nih.gov/entrez/query.fcgi?db=gene&cmd=Retrieve&dopt=full_report&list_uids=80781	https://www.genenames.org/data/gene-symbol-report/#!/hgnc_id/HGNC:HGNC:2195
ADGRF1	6	complement(46997703..47042363)	3.70665	0.5368	1.45075	2.092e-09	2.828e-06	5.373e-05	https://www.ncbi.nlm.nih.gov/entrez/query.fcgi?db=gene&cmd=Retrieve&dopt=full_report&list_uids=266977	https://www.genenames.org/data/gene-symbol-report/#!/hgnc_id/HGNC:HGNC:18990
FAM72C	1	complement(143955364..143974219)	7.08882	0.501671	1.41585	2.396e-09	3.077e-06	6.154e-05	https://www.ncbi.nlm.nih.gov/entrez/query.fcgi?db=gene&cmd=Retrieve&dopt=full_report&list_uids=554282	https://www.genenames.org/data/gene-symbol-report/#!/hgnc_id/HGNC:HGNC:30602
SLCO4A1	20	62642445..62690700	15.1843	-0.414743	-1.33306	2.994e-09	3.662e-06	7.691e-05	https://www.ncbi.nlm.nih.gov/entrez/query.fcgi?db=gene&cmd=Retrieve&dopt=full_report&list_uids=28231	https://www.genenames.org/data/gene-symbol-report/#!/hgnc_id/HGNC:HGNC:10953
ITGA11	15	complement(68297433..68432312)	3.67759	-0.471904	-1.38694	4.617e-09	5.391e-06	0.0001186	https://www.ncbi.nlm.nih.gov/entrez/query.fcgi?db=gene&cmd=Retrieve&dopt=full_report&list_uids=22801	https://www.genenames.org/data/gene-symbol-report/#!/hgnc_id/HGNC:HGNC:6136
MT2A	16	56608566..56609497	5251.64	-0.384109	-1.30505	6.272e-09	7.005e-06	0.0001611	https://www.ncbi.nlm.nih.gov/entrez/query.fcgi?db=gene&cmd=Retrieve&dopt=full_report&list_uids=4502	https://www.genenames.org/data/gene-symbol-report/#!/hgnc_id/HGNC:HGNC:7406
BGN	X	153494889..153509554	47.0083	-0.409707	-1.32842	7.218e-09	7.551e-06	0.0001854	https://www.ncbi.nlm.nih.gov/entrez/query.fcgi?db=gene&cmd=Retrieve&dopt=full_report&list_uids=633	https://www.genenames.org/data/gene-symbol-report/#!/hgnc_id/HGNC:HGNC:1044
COL11A1	1	complement(102876467..103108580)	7.79513	-0.431548	-1.34868	7.348e-09	7.551e-06	0.0001888	https://www.ncbi.nlm.nih.gov/entrez/query.fcgi?db=gene&cmd=Retrieve&dopt=full_report&list_uids=1301	https://www.genenames.org/data/gene-symbol-report/#!/hgnc_id/HGNC:HGNC:2186
LAMC2	1	183186039..183245127	358.373	-0.368633	-1.29113	2.452e-08	2.356e-05	0.0006298	https://www.ncbi.nlm.nih.gov/entrez/query.fcgi?db=gene&cmd=Retrieve&dopt=full_report&list_uids=3918	https://www.genenames.org/data/gene-symbol-report/#!/hgnc_id/HGNC:HGNC:6493
AHNAK2	14	complement(104937253..104978357)	2.03937	-0.44713	-1.36333	2.477e-08	2.356e-05	0.0006362	https://www.ncbi.nlm.nih.gov/entrez/query.fcgi?db=gene&cmd=Retrieve&dopt=full_report&list_uids=113146	https://www.genenames.org/data/gene-symbol-report/#!/hgnc_id/HGNC:HGNC:20125
DDX58	9	complement(32455302..32526324)	15.282	-0.409006	-1.32777	2.683e-08	2.461e-05	0.0006891	https://www.ncbi.nlm.nih.gov/entrez/query.fcgi?db=gene&cmd=Retrieve&dopt=full_report&list_uids=23586	https://www.genenames.org/data/gene-symbol-report/#!/hgnc_id/HGNC:HGNC:19102
IDI1	10	complement(1039419..1056716)	8.37435	0.433255	1.35028	3.067e-08	2.717e-05	0.0007878	https://www.ncbi.nlm.nih.gov/entrez/query.fcgi?db=gene&cmd=Retrieve&dopt=full_report&list_uids=3422	https://www.genenames.org/data/gene-symbol-report/#!/hgnc_id/HGNC:HGNC:5387
IFIT3	10	89327819..89340968	30.1766	-0.400236	-1.31972	3.272e-08	2.802e-05	0.0008406	https://www.ncbi.nlm.nih.gov/entrez/query.fcgi?db=gene&cmd=Retrieve&dopt=full_report&list_uids=3437	https://www.genenames.org/data/gene-symbol-report/#!/hgnc_id/HGNC:HGNC:5411
EGR1	5	138465492..138469315	27.1284	-0.395301	-1.31522	4.881e-08	4.045e-05	0.001254	https://www.ncbi.nlm.nih.gov/entrez/query.fcgi?db=gene&cmd=Retrieve&dopt=full_report&list_uids=1958	https://www.genenames.org/data/gene-symbol-report/#!/hgnc_id/HGNC:HGNC:3238
BLOC1S5-TXNDC5	6	complement(7881250..8064414)	3.55732	0.920316	1.89253	6.219e-08	4.993e-05	0.001598	https://www.ncbi.nlm.nih.gov/entrez/query.fcgi?db=gene&cmd=Retrieve&dopt=full_report&list_uids=100526836	https://www.genenames.org/data/gene-symbol-report/#!/hgnc_id/HGNC:HGNC:42001
ZNF385A	12	complement(54369129..54391609)	12.1638	-0.420497	-1.33839	8.603e-08	6.697e-05	0.00221	https://www.ncbi.nlm.nih.gov/entrez/query.fcgi?db=gene&cmd=Retrieve&dopt=full_report&list_uids=25946	https://www.genenames.org/data/gene-symbol-report/#!/hgnc_id/HGNC:HGNC:17521
COL3A1	2	188974373..189012746	59.3732	-0.358336	-1.28195	1.165e-07	8.805e-05	0.002994	https://www.ncbi.nlm.nih.gov/entrez/query.fcgi?db=gene&cmd=Retrieve&dopt=full_report&list_uids=1281	https://www.genenames.org/data/gene-symbol-report/#!/hgnc_id/HGNC:HGNC:2201
GM2A	5	151253052..151270394	26.6675	-0.375787	-1.29755	1.509e-07	0.0001079	0.003875	https://www.ncbi.nlm.nih.gov/entrez/query.fcgi?db=gene&cmd=Retrieve&dopt=full_report&list_uids=2760	https://www.genenames.org/data/gene-symbol-report/#!/hgnc_id/HGNC:HGNC:4367
PI16	6	36948263..36964837	4.93471	-0.682363	-1.60477	1.512e-07	0.0001079	0.003883	https://www.ncbi.nlm.nih.gov/entrez/query.fcgi?db=gene&cmd=Retrieve&dopt=full_report&list_uids=221476	https://www.genenames.org/data/gene-symbol-report/#!/hgnc_id/HGNC:HGNC:21245
IL11	19	complement(55364382..55370463)	41.5758	-0.373585	-1.29557	1.772e-07	0.0001231	0.004553	https://www.ncbi.nlm.nih.gov/entrez/query.fcgi?db=gene&cmd=Retrieve&dopt=full_report&list_uids=3589	https://www.genenames.org/data/gene-symbol-report/#!/hgnc_id/HGNC:HGNC:5966
SEMA4B	15	90184920..90229660	20.179	-0.3743	-1.29621	2.527e-07	0.0001708	0.006492	https://www.ncbi.nlm.nih.gov/entrez/query.fcgi?db=gene&cmd=Retrieve&dopt=full_report&list_uids=10509	https://www.genenames.org/data/gene-symbol-report/#!/hgnc_id/HGNC:HGNC:10730
RALGPS2	1	178725147..178921842	4.79233	0.411583	1.33014	2.947e-07	0.0001911	0.007571	https://www.ncbi.nlm.nih.gov/entrez/query.fcgi?db=gene&cmd=Retrieve&dopt=full_report&list_uids=55103	https://www.genenames.org/data/gene-symbol-report/#!/hgnc_id/HGNC:HGNC:30279
PLVAP	19	complement(17351448..17377349)	8.13682	-0.615045	-1.53161	2.975e-07	0.0001911	0.007643	https://www.ncbi.nlm.nih.gov/entrez/query.fcgi?db=gene&cmd=Retrieve&dopt=full_report&list_uids=83483	https://www.genenames.org/data/gene-symbol-report/#!/hgnc_id/HGNC:HGNC:13635
HSPG2	1	complement(21822232..21937297)	14.3918	-0.34751	-1.27236	3.887e-07	0.0002436	0.009986	https://www.ncbi.nlm.nih.gov/entrez/query.fcgi?db=gene&cmd=Retrieve&dopt=full_report&list_uids=3339	https://www.genenames.org/data/gene-symbol-report/#!/hgnc_id/HGNC:HGNC:5273
SERPINB2	18	63887705..63903890	535.312	0.334129	1.26062	4.771e-07	0.0002918	0.0122557	https://www.ncbi.nlm.nih.gov/entrez/query.fcgi?db=gene&cmd=Retrieve&dopt=full_report&list_uids=5055	https://www.genenames.org/data/gene-symbol-report/#!/hgnc_id/HGNC:HGNC:8584
TNC	9	complement(115019575..115118257)	19.5203	-0.346097	-1.27112	5.349e-07	0.0003195	0.0137397	https://www.ncbi.nlm.nih.gov/entrez/query.fcgi?db=gene&cmd=Retrieve&dopt=full_report&list_uids=3371	https://www.genenames.org/data/gene-symbol-report/#!/hgnc_id/HGNC:HGNC:5318
TYMP	22	complement(50525752..50530085)	15.1089	-0.42123	-1.33907	5.708e-07	0.0003332	0.0146622	https://www.ncbi.nlm.nih.gov/entrez/query.fcgi?db=gene&cmd=Retrieve&dopt=full_report&list_uids=1890	https://www.genenames.org/data/gene-symbol-report/#!/hgnc_id/HGNC:HGNC:3148
GREM1	15	32717940..32734669	12.0504	-0.377695	-1.29926	6.847e-07	0.0003908	0.0175878	https://www.ncbi.nlm.nih.gov/entrez/query.fcgi?db=gene&cmd=Retrieve&dopt=full_report&list_uids=26585	https://www.genenames.org/data/gene-symbol-report/#!/hgnc_id/HGNC:HGNC:2001
CITED4	1	complement(40861056..40862346)	19.7181	-0.425161	-1.34272	7.448e-07	0.0004042	0.0191321	https://www.ncbi.nlm.nih.gov/entrez/query.fcgi?db=gene&cmd=Retrieve&dopt=full_report&list_uids=163732	https://www.genenames.org/data/gene-symbol-report/#!/hgnc_id/HGNC:HGNC:18696
HELZ2	20	complement(63558086..63574239)	7.4278	-0.362246	-1.28543	7.467e-07	0.0004042	0.0191803	https://www.ncbi.nlm.nih.gov/entrez/query.fcgi?db=gene&cmd=Retrieve&dopt=full_report&list_uids=85441	https://www.genenames.org/data/gene-symbol-report/#!/hgnc_id/HGNC:HGNC:30021
TNS4	17	complement(40475828..40501681)	9.79922	-0.385196	-1.30604	7.73e-07	0.0004042	0.0198567	https://www.ncbi.nlm.nih.gov/entrez/query.fcgi?db=gene&cmd=Retrieve&dopt=full_report&list_uids=84951	https://www.genenames.org/data/gene-symbol-report/#!/hgnc_id/HGNC:HGNC:24352
CBSL	21	complement(6444868..6468606)	1.16874	1.31476	2.48762	7.859e-07	0.0004042	0.0201886	https://www.ncbi.nlm.nih.gov/entrez/query.fcgi?db=gene&cmd=Retrieve&dopt=full_report&list_uids=102724560	https://www.genenames.org/data/gene-symbol-report/#!/hgnc_id/HGNC:HGNC:51829
IFI44	1	78648554..78664078	10.8953	-0.364605	-1.28753	7.868e-07	0.0004042	0.0202101	https://www.ncbi.nlm.nih.gov/entrez/query.fcgi?db=gene&cmd=Retrieve&dopt=full_report&list_uids=10561	https://www.genenames.org/data/gene-symbol-report/#!/hgnc_id/HGNC:HGNC:16938
CCDC69	5	complement(151181052..151224093)	12.0544	-0.388758	-1.30927	8.11e-07	0.0004085	0.020834	https://www.ncbi.nlm.nih.gov/entrez/query.fcgi?db=gene&cmd=Retrieve&dopt=full_report&list_uids=26112	https://www.genenames.org/data/gene-symbol-report/#!/hgnc_id/HGNC:HGNC:24487
PCDH7	4	30720378..31146801	4.14098	-0.378515	-1.3	8.378e-07	0.0004139	0.0215209	https://www.ncbi.nlm.nih.gov/entrez/query.fcgi?db=gene&cmd=Retrieve&dopt=full_report&list_uids=5099	https://www.genenames.org/data/gene-symbol-report/#!/hgnc_id/HGNC:HGNC:8659
BNIP3	10	complement(131967683..131982013)	84.6497	-0.340491	-1.26619	1.12e-06	0.0005429	0.0287727	https://www.ncbi.nlm.nih.gov/entrez/query.fcgi?db=gene&cmd=Retrieve&dopt=full_report&list_uids=664	https://www.genenames.org/data/gene-symbol-report/#!/hgnc_id/HGNC:HGNC:1084
ITGA5	12	complement(54395261..54419266)	30.4085	-0.33872	-1.26463	1.4e-06	0.0006618	0.0359544	https://www.ncbi.nlm.nih.gov/entrez/query.fcgi?db=gene&cmd=Retrieve&dopt=full_report&list_uids=3678	https://www.genenames.org/data/gene-symbol-report/#!/hgnc_id/HGNC:HGNC:6141
COL5A1	9	134641790..134844843	22.1189	-0.329087	-1.25622	1.417e-06	0.0006618	0.0363983	https://www.ncbi.nlm.nih.gov/entrez/query.fcgi?db=gene&cmd=Retrieve&dopt=full_report&list_uids=1289	https://www.genenames.org/data/gene-symbol-report/#!/hgnc_id/HGNC:HGNC:2209
CDC27P10	21	complement(8422330..8426105)	4.92326	-3.19647	-9.16711	1.546e-06	0.0007094	0.0397259	https://www.ncbi.nlm.nih.gov/entrez/query.fcgi?db=gene&cmd=Retrieve&dopt=full_report&list_uids=102723584	https://www.genenames.org/data/gene-symbol-report/#!/hgnc_id/HGNC:HGNC:51760
PLXNA2	1	complement(208022242..208244384)	3.03159	-0.379895	-1.30125	1.793e-06	0.0007949	0.0460555	https://www.ncbi.nlm.nih.gov/entrez/query.fcgi?db=gene&cmd=Retrieve&dopt=full_report&list_uids=5362	https://www.genenames.org/data/gene-symbol-report/#!/hgnc_id/HGNC:HGNC:9100
P2RY2	11	73200416..73246743	1.53791	-0.435205	-1.3521	1.795e-06	0.0007949	0.046103	https://www.ncbi.nlm.nih.gov/entrez/query.fcgi?db=gene&cmd=Retrieve&dopt=full_report&list_uids=5029	https://www.genenames.org/data/gene-symbol-report/#!/hgnc_id/HGNC:HGNC:8541
