# Supplementary material for: Inflammation induced by tumor-associated nerves promotes resistance to anti-PD-1 therapy in cancer patients and is targetable by IL-6 blockade
Source: Research Square preprint supplement (doi:10.21203/rs.3.rs-3161761/v1), 2023-07-18
Supplement: Supplementary file 6 [file 778e0bafe1dbe4548df5912d.xlsx]

## Sheet: Gene listÍ
Gene Set use for Figure 1F
LCN12
RASSF3
SPN
GDF7
A1BG
DAZL
MBP
RPLP2
KRBOX4
ZNF577
ICOS
RPL14
RPS14
RPL32
ZFAND6
TGIF2
RPS9
RPS29
HLA-E
MME
RPS12
RPS27A
ZBTB40
RPL29
RPS15
EID1
RPS6
ACTA1
TNFRSF10C
RPL30
MARCKS
RPL18A
RPL37
RPL19
GUCY1A2
GPX1
COL3A1
ATF4
DNAH12
HNRNPH1
MYOZ1
CWF19L2
PDCD2
ANXA5
DDX5
RPS19
RPS16
RPL28
EIF4A1
HSPG2
STT3B
HNRNPU
RPLP1
MZT2B
RPL41
HDLBP
RPL36
TRANK1
ACP2
COX5A
PTMA
KLHL20
RPS26
TMEM30A
MYL6
RPS2
RPS17
RPLP0
PLPP7
PNN
ELL
TCAP
COX6B1
ZNF33B
FZR1
ILF3
RPS21
HNRNPA1
LGALS1
NPM1
EMILIN1
TTBK2
HNRNPA2B1
TMSB10
R3HCC1L
YBX1
ELMOD2
H3F3B
NCL
EIF4G2
CES4A
CFL1
ATP6V1E1
CALR
OTUD4
RNF212
CEP164
SRSF2
PCYT2
COL8A1
MCRS1
ATP5F1B
ANAPC4
TAGLN2
CD44
COL4A1
CDK2AP1
CLIC1
CRABP2
GSK3B
ANXA2
DNAJB6
HIST1H1E
COX8A
ATG5
SLC16A2
ITGAV
STAT2
MRPS10
GALNT2
FBXL2
HIST2H3D
SEC61G
ENO1
HIST1H4K
TPI1
S100A11
UBAC1
TAF1B
EPPK1
MRPL58
HIST1H1D
HIST1H2BC
HIST1H2BG
HIST1H2AG
KLK7
GSTP1
DSP
HIST1H2AC
HIST1H3H
HIST1H1B
HIST1H3G
GRHL3
KRT5
FABP5
ITGB6
HEPHL1
PTPRZ1
KRT6A
WNT7B
