# Supplementary material for: Inflammation induced by tumor-associated nerves promotes resistance to anti-PD-1 therapy in cancer patients and is targetable by IL-6 blockade
Source: Research Square preprint supplement (doi:10.21203/rs.3.rs-3161761/v1), 2023-07-18
Supplement: Supplementary file 7 [file e52747725251d7e94ae51615.xlsx]

## Sheet: Sheet2
Patient number	Age	Sex	T	N	M	Pri-neural invasion
1	67.926	M	2	0	0	N
2	79.6575	M	2	0	0	Y
3	71.4877	F	1	0	0	na
4	76.6658	M	1	0	0	na
5	80.5205	M	1	0	0	na
6	54.137	F	1	0	0	na
7	86.3233	F	3	0	0	N
8	83.6575	M	1	0	0	na
9	78.5315	M	1	0	0	na
10	86.1315	M	1	0	0	N
11	70.9452	M	1	0	0	Y
TMN staging is based on: Amin, M. B., et al. (2017). "The Eighth Edition AJCC Cancer Staging Manual: Continuing to build a bridge from a population-based to a more "personalized" approach to cancer staging." CA Cancer J Clin 67(2): 93-99.
